1 **Gene regulation by DNA methylation is contingent on chromatin accessibility**  
2 **during transgenerational plasticity in the purple sea urchin**

3  
4 Samuel N Bogan<sup>1</sup>, Marie E Strader<sup>1,2</sup>, Gretchen E Hofmann<sup>1</sup>

5  
6 <sup>1</sup>Department of Ecology, Evolution and Marine Biology, University of California Santa Barbara

7 <sup>2</sup>Department of Biological Sciences, Auburn University

8  
9 **Correspondence:**

10 Samuel N Bogan

11 [snbogan@ucsb.edu](mailto:snbogan@ucsb.edu)

12  
13 **ORCID iDs:**

14 SNB – 0000-0003-2244-5169

15 MES – 0000-0002-1886-4187

16 GEH – 0000-0003-0931-1238

17

18

19

20

21

22

23

24 **Abstract**

25           Epigenetic processes are proposed to contribute to phenotypic plasticity. In invertebrates,  
26 DNA methylation commonly varies across environments and can correlate or causally associate  
27 with phenotype, but its role in transcriptional responses to the environment remains unclear.  
28 Maternal environments experienced by the sea urchin *Strongylocentrotus purpuratus* induce 3 –  
29 6x greater differential CpG methylation in offspring larvae relative to larval developmental  
30 environments, suggesting a role for DNA methylation in transgenerational plasticity (TGP).  
31 However, a negligible association has been observed between differentially methylated and  
32 differentially expressed genes. What gene regulatory roles does invertebrate DNA methylation  
33 possess under environmental change, if any? We quantified DNA methylation and gene  
34 expression in *S. purpuratus* larvae exposed to different ecologically relevant conditions during  
35 gametogenesis (maternal conditioning) or embryogenesis (developmental conditioning). We  
36 modeled differential gene expression and differential splicing under maternal conditioning as  
37 functions of DNA methylation, incorporating variables for genomic feature and chromatin  
38 accessibility. We detected significant interactions between differential methylation, chromatin  
39 accessibility, and genic architecture associated with differential expression and splicing.  
40 Observed transcriptional responses to maternal conditioning were also 4 – 13x more likely when  
41 accounting for interactions between methylation and chromatin accessibility. Our results provide  
42 evidence that DNA methylation possesses multiple functional roles during TGP in *S. purpuratus*,  
43 but its effects are contingent upon other genomic and epigenomic states. Singularly unproductive  
44 of transcription, DNA methylation is likely one cog in the epigenomic machinery contributing to  
45 environmental responses and phenotypic plasticity in *S. purpuratus* and other invertebrates.

46

## 47 **1. Introduction**

48           Phenotypic plasticity, variation of a trait's expression in the absence of genetic variation,  
49 can elicit both adaptive and maladaptive responses to rapid environmental change on ecological  
50 timescales (Donelan et al., 2020; Marshall & Uller, 2007). However, the molecular processes  
51 that mediate plasticity remain poorly understood. Uncovering these mechanisms will inform our  
52 understanding of physiological and evolutionary responses to changing environments (Herman &  
53 Sultan, 2011; Jones & Robinson, 2018). Epigenetic modifications to the genome such as DNA  
54 methylation are one suite of regulatory factors that, in some cases, underpin plasticity by driving  
55 changes in transcription and subsequent phenotypes (Xu et al., 2019). Our understanding of  
56 differential DNA methylation's effects on gene expression and phenotype in metazoans is mostly  
57 derived from studies in vertebrates, but research in invertebrates finds correlations between  
58 changes in DNA methylation and phenotype across distinct environments, suggesting that  
59 methylation may influence acclimatization (Eirin-Lopez & Putnam, 2019; Hofmann, 2017).  
60 Connections between DNA methylation, plasticity, and acclimatization hinge on how and  
61 whether DNA methylation modulates gene regulation. Invertebrate DNA methylation frequently  
62 exhibits negligible relationships with differential expression (DE) and other modes of gene  
63 regulation in environmental studies, posing an obstacle to assessing the epigenetic basis of  
64 acclimatization to current and future environments. However, DNA methylation does not  
65 influence gene expression independent of other epigenetic and genetic factors. Using the purple  
66 sea urchin *Strongylocentrotus purpuratus* as a model invertebrate, we tested the hypothesis that  
67 the effects of differential methylation (DM) on gene regulation (differential expression and  
68 alternative splicing) are contingent upon additional epigenomic and genomic states such as  
69 chromatin accessibility and genic architecture. This integrated epigenomic approach allowed us

70 to determine what regulatory roles DNA methylation in *S. purpuratus* possesses, if any, during  
71 plastic responses to ecologically relevant stressors that are worsening under climate change.

72 Multiple lines of evidence support DNA methylation's influence on invertebrate ecology  
73 and biology. In broadly dispersing marine invertebrates, high connectivity reduces structure  
74 across populations inhabiting distinct environments, and interpopulation epigenetic divergence  
75 can exceed genetic divergence (Ardura, Zaiko, Moran, Planes, & Garcia-Vazquez, 2017;  
76 Johnson & Kelly, 2020; Ni et al., 2018; Watson, Baldanzi, Pérez-Figueroa, Gouws, & Porri,  
77 2018; Zhang, Li, Kong, & Yu, 2018). *In situ* temporospatial environmental variation has been  
78 linked to modifications in invertebrate methylomes independent of genetic variation,  
79 demonstrating a potential role for DM during acclimatization. (Clark et al., 2018; Dimond &  
80 Roberts, 2020; Rodríguez-Casariego et al., 2020; Wang, Li, et al., 2021). DM of genes, gene  
81 modules, or whole genomes induced by environmental variation are associated with performance  
82 traits in stony corals, molluscs, crustaceans, and insects (Arsenault, Hunt, & Rehan, 2018; Clark  
83 et al., 2018; Li et al., 2018; Norouzitallab et al., 2014; Putnam, Davidson, & Gates, 2016).  
84 Causative tests of DNA methylation's effect on phenotype have also been conducted. In the  
85 crustacean *Daphnia magna*, inhibition of *de novo* methyltransferases in the P generation induced  
86 genome-wide hypomethylation and DE of essential metabolic pathways, proceeding to impact  
87 performance and expression in F1 and F2 generations while leaving histone modifications  
88 unaffected (Lindeman et al., 2019; Vandegheuchte, Lemiere, Vanhaecke, Vanden Berghe, &  
89 Janssen, 2010). Environmentally induced changes and intraspecific variation in DNA  
90 methylation can also be inherited across the germline in some invertebrate taxa (Liew et al.,  
91 2020; Wang, Werren, & Clark, 2016). Testing the gene regulatory roles of DNA methylation will



92 uncover its potential functions in a diversity of biological processes, particularly mechanisms of  
93 developmental and transgenerational plasticity (TGP) which drive acclimatization.

94 DNA methylation's effects on gene regulation and its interactions with other epigenetic  
95 factors are both highly multiplicative. Most invertebrate phyla exhibit sparsely methylated  
96 genomes punctuated by high levels of CpG methylation within gene bodies (Keller, Han, & Yi,  
97 2016; Suzuki, Kerr, De Sousa, & Bird, 2007; Zemach, McDaniel, Silva, & Zilberman, 2010).  
98 Patterns of invertebrate gene body methylation (GBM) vary across (i) genic features such as  
99 promoters, introns, exons, and UTRs (Li et al., 2018; Riviere et al., 2017) and (ii) phylogeny (de  
100 Mendoza et al., 2019; Keller et al., 2016; Sarda, Zeng, Hunt, & Yi, 2012). GBM positively  
101 correlates with gene expression in cnidarians (Dixon, Liao, Bay, & Matz, 2018; Li et al., 2018;  
102 Zemach et al., 2010), bivalve molluscs of *Crassostrea sp.* (Downey-Wall et al., 2020; Johnson,  
103 Sirovy, Casas, La Peyre, & Kelly, 2020), and arthropods (Bonasio et al., 2012; Gatzmann et al.,  
104 2018; Glastad, Gokhale, Liebig, & Goodisman, 2016; Kvist et al., 2018) with exceptions to this  
105 pattern evident in some species and cell types (de Mendoza et al., 2019; Flores et al., 2012;  
106 Wang, Song, et al., 2021). By contrast, inducible changes in invertebrate gene expression in  
107 response to environmental variation have frequently possessed insignificant relationships with  
108 differential GBM (Arsenault et al., 2018; Dixon et al., 2018; Downey-Wall et al., 2020; Johnson  
109 et al., 2020; Strader et al., 2020). In some arthropods, molluscs, and nematodes, there is evidence  
110 that GBM aids in regulating alternative splicing and exon skipping (Flores et al., 2012; Gao et  
111 al., 2012; Li-Byarlay et al., 2013; Libbrecht, Oxley, Keller, & Kronauer, 2016; Song, Li, &  
112 Zhang, 2017). Among these taxa, changes in alternative splicing under environmental change  
113 have shown relationships with differential GBM of varying strengths (Arsenault et al., 2018;  
114 Glastad et al., 2016). Invertebrate DNA methylation is also associated with chromatin state

115 (Gatzmann et al., 2018; Nanty et al., 2011) and the suppression of spurious intragenic  
116 transcription (Li et al., 2018). Determining the function of DM during transcriptional responses  
117 to the environment thus requires an integrated approach that considers genic architecture,  
118 additional epigenetic features, and multiple modes of gene regulation (Moler et al., 2018).

119         The purple sea urchin *Strongylocentrotus purpuratus* is a uniquely poised model  
120 invertebrate in which to conduct an integrative test of DNA methylation's regulatory roles during  
121 phenotypic plasticity. *S. purpuratus* is an abundant herbivore distributed throughout North  
122 America's Pacific subtidal kelp forests and rocky intertidal. Populations inhabiting  
123 environmental gradients or mosaics exhibit genetic evidence of local adaptation and  
124 interpopulation variation in performance and gene expression under ecologically relevant stress  
125 (Evans, Chan, Menge, & Hofmann, 2013; Evans, Pespeni, Hofmann, Palumbi, & Sanford, 2017;  
126 Kelly, Padilla-Gamino, & Hofmann, 2013; Pespeni, Chan, Menge, & Palumbi, 2013; Pespeni &  
127 Palumbi, 2013). CpG methylation is more abundant in *S. purpuratus* relative to most  
128 invertebrates, likely because of its phylogenetic position as a basal deuterostome (Regev, Lamb,  
129 & Jablonka, 1998). TGP linked to maternal effects have been observed in *S. purpuratus* for traits  
130 including egg protein content, larval body size, gene expression, and DNA methylation  
131 (Hoshijima & Hofmann, 2019; Strader et al., 2020; Strader, Wong, Kozal, Leach, & Hofmann,  
132 2019; Wong, Johnson, Kelly, & Hofmann, 2018; Wong, Kozal, Leach, Hoshijima, & Hofmann,  
133 2019) alongside similar observations in congeneric *Strongylocentrotus spp.* (Ding et al., 2019)  
134 and other urchin genera (Clark et al., 2019; Karelitz, Lamare, Patel, Gemmell, & Uthicke, 2019;  
135 Wong & Hofmann, 2020; Wong & Hofmann, 2021). Maternal conditioning of *S. purpuratus* to  
136 abiotic conditions mimicking coastal upwelling can induce 3 – 6x greater DM in offspring larvae  
137 relative to the effects of larval development under upwelling (Strader et al., 2020; Strader et al.,

138 2019). Maternal conditioning of *S. purpuratus* can also trigger DE of a larger number of genes  
139 than progeny conditioning (Wong et al., 2018). These results suggest a function for DM in  
140 facilitating TGP's effects on gene expression, but negligible overlap between DM CpGs and DE  
141 genes has left that role ambiguous (Strader et al., 2020). Accounting for interactions between  
142 DNA methylation and additional epigenomic states in *S. purpuratus*, which may better explain  
143 epigenetic effects on transcription, is made possible by the species' use as a model of  
144 deuterostome embryology, yielding developmental time series of chromatin accessibility (e.g.,  
145 ATAC-seq) spanning the two-cell embryo to late prism larva.

146 To elucidate the gene regulatory roles of differential methylation during TGP, we  
147 quantified changes in DNA methylation, gene expression, and alternative splicing in prism larvae  
148 induced by maternal exposure to ecologically relevant, abiotic stress in *S. purpuratus* using data  
149 from Strader *et al.*, 2020 initially exhibiting limited overlap between DM and DE genes and  
150 robust annotations of chromatin accessibility during the *S. purpuratus* prism stage (Kudtarkar &  
151 Cameron, 2017). We then modeled differential expression and splicing as functions of DM,  
152 genic feature type, and chromatin accessibility to test the hypothesis that invertebrate DNA  
153 methylation's regulatory role is contingent upon additional genomic and epigenomic factors and  
154 reveal epigenetic interactions influencing gene expression during TGP.

155

## 156 **2. Methods**

157 *2.1. Data sources* – To investigate the potential gene regulatory role of DNA methylation  
158 on transcription, we used previously published and publicly available datasets. For RNA-seq and  
159 bisulfite sequencing datasets, a controlled transgenerational experiment was performed (Strader  
160 et al. 2020). Briefly, adult urchins were conditioned to two treatments, non-upwelling ( $631 \pm 106$

161  $\mu\text{atm } p\text{CO}_2$  and  $16.8 \pm 0.2$  °C) and upwelling ( $1390 \pm 307$   $\mu\text{atm } p\text{CO}_2$  and  $12.7 \pm 0.5$  °C),  
162 mimicking variation in their natural environment (Hoshijima & Hofmann, 2019). Temperature  
163 and  $p\text{CO}_2$  conditions were maintained by a flow-through  $\text{CO}_2$  system (Fangue et al., 2010) and  
164 described in detail by Strader et al. 2020. Briefly, treated seawater was evenly pumped from two  
165 reservoir tanks to conditioning tanks at a rate of 20 L/hr. Adult urchins were induced to spawn  
166 and fertilizations were performed in ambient seawater conditions. Embryos were reared in either  
167 the same conditions as their parents or the reciprocal condition in triplicate using a flowthrough  
168 system with seawater treated as described above and by Strader et al. 2020.

169         Once larval development progressed to the early prism stage, replicate samples of 6,000  
170 larvae were collected for RNA-seq and reduce representation bisulfite sequencing (RRBS) and  
171 flash frozen in liquid nitrogen before storage at -80 °C. Libraries for polyA-enriched RNA-seq  
172 and RRBS were constructed at the UC Davis genome center and sequenced on the Illumina 4000  
173 (BioProject: PRJNA548926). The use of polyA-enriched RNA-seq libraries is beneficial for  
174 analyzing alternative splicing as it mitigates the contribution of unprocessed RNA to  
175 quantification of differential exon use (Sultan et al., 2014). RRBS poses fewer biases on CpG  
176 representation across genomic feature type relative to other reduced representation BS-seq  
177 methods (Trigg et al., 2021). ATAC-seq data was obtained through the GEO expression omnibus  
178 (BioProject: PRJNA377768). This dataset represents a developmental time course of Tn5  
179 transposon chromatin accessibility regions in the *S. purpuratus* genome.

180         For comparison with the Strader *et al.*, 2020 datasets, we chose ATAC-seq profiles for  
181 animals at 39 hours post-fertilization, the closest developmental time point for early prism  
182 larvae, for which 3 pooled samples were sequenced (GSM2520650, GSM2520651,  
183 GSM2520652). ATAC-seq bed files were concatenated and summarized using the R package

184 *ChIPSeeker* v1.22.1 to quantify chromatin accessibility, expressed as the mean density of Tn5  
185 ATAC-seq reads, across intra- and intergenic and genomic features. Mean chromatin  
186 accessibility of  $\pm 500$  bp transcriptional start sites (TSS), introns, and exons were each calculated  
187 in both gene- and feature-wise manners for analysis.

188       2.2. *Gene expression analyses* – RNA-seq reads were trimmed of adaptor sequences and  
189 filtered for quality using *TrimGalore*. Cleaned reads were mapped to the *S. purpuratus* genome  
190 (v3.1) using *hisat2* (Kim, Langmead, & Salzberg, 2015). Gene and exon counts were compiled  
191 with *featureCounts* (Liao et al. 2014) and analyzed in *edgeR* v3.28.1 (Robinson, McCarthy, &  
192 Smyth, 2010) for analyses of DE and differential exon use (DEU), a measure of exon inclusion  
193 or exclusion attributable to skipping and splicing. Gene-level and exon-level read counts were  
194 filtered to retain genes with  $> 0.5$  counts per million (CPM) across at least 75% of all samples.

195       In order to test for DE and DEU, gene- and exon-level counts were modeled as a function  
196 of maternal environment, developmental environment, and their interaction using the robust  
197 iteration of the *edgeR* glmQLfit function to fit negative binomial generalized linear models  
198 (GLMs). Robust negative binomial dispersion estimates were calculated using empirical  
199 Bayesian shrinkage with the *edgeR* function estimateGLMRobustDisp. Log<sub>2</sub> foldchanges  
200 (logFC), F-statistic scores, and p-values for genewise DE between maternal and developmental  
201 treatments were estimated using the *edgeR* function glmQLFTest to account for uncertainty of  
202 tagwise dispersion estimates and improve type I error control. Significant DE was determined  
203 using FDR-adjusted p-values ( $\alpha = 0.05$ ). DEU was assessed by applying the *edgeR* function  
204 diffSpliceDGE to exon-level negative binomial GLMs which output exon use coefficients  
205 denoted as  $\Delta\logFC$  (exon logFC – gene logFC) as well as likelihood coefficients and FDR-

206 adjusted p-values ( $\alpha = 0.05$ ) for LRTs of gene- and exon-level DEU (McCarthy, Chen, &  
207 Smyth, 2012; Robinson et al., 2010).

208 Quantifying DEU attributable to alternative splicing and exon skipping required the  
209 removal of genes exhibiting patterns of exon use consistent with spurious intragenic transcription  
210 and alternative TSS. Genes that are spuriously transcribed or exhibit alternative TSS possess  
211 exons with progressively lower inclusion toward 5' ends (Li et al., 2018). Filtering out such  
212 genes from exon-level read counts used in DEU analysis required the fitting linear models to  
213 exon-use data of each gene and removing genes with positive slopes and a y-intercept of DEU >  
214 -0.25. Without this filtering step, 56.0% of genes that exhibited significant DEU under maternal  
215 upwelling would likely have been attributed to alternative TSS or spurious transcription while  
216 such genes would have composed 64.9% of significant DEU under developmental upwelling.  
217 While this approach honed in on DEU attributed to splicing and exon skipping, it is likely to  
218 remove genes with few exons in which a 5' exon removed during splicing. Plots of DEU trends  
219 demonstrative of spurious transcription or alternative TSS are available in the GitHub repository  
220 [https://github.com/snbogan/Sp\\_RRBS\\_ATAC](https://github.com/snbogan/Sp_RRBS_ATAC).

221 Enriched gene ontologies (GO) were identified among genes exhibiting DE or DEU with  
222 Mann–Whitney U-tests input with signed,  $-\log$  p-values using rank-based gene ontology analysis  
223 with adaptive clustering (Wright, Aglyamova, Meyer, & Matz, 2015) parameterized with alpha  
224 value = 0.05 and minimum GO-term group size = 5 genes for gene-level enrichment. Alpha =  
225 0.01 and min. Minimum GO-term group size = 25 genes for exon-level enrichment to account  
226 for a mean exon count of  $\sim 5$  per gene in the *S. purpuratus* genome.

227 *2.3. DNA methylation analyses* – RRBS sequences were trimmed and filtered with  
228 *TrimGalore* specifying the `--rrbs` option. Trimmed RRBS reads were mapped to the genome

229 using *Bismark* (Krueger & Andrews, 2011), and methylation calls were determined using the  
230 `bismark_methylation_extractor` command using default settings. Coverage files were used for  
231 subsequent DM analysis using an adapted *edgeR* workflow for RRBS data (Chen, Pal, Visvader,  
232 & Smyth, 2017). To examine feature-specific responses by DNA methylation to environmental  
233 treatments, DM was estimated as the logFC of summed methylation scores across all CpGs  
234 within the -1 kb promoters, introns, and exons of a given gene. For each feature type, summed  
235 counts were filtered to include only genes represented by  $\geq 10$  reads across all samples. *edgeR*  
236 was selected for DM analysis to provide a statistical framework unified with estimations of DE  
237 and DEU. Functional enrichment of GO terms among differentially methylated genes was  
238 assessed using Mann–Whitney U-tests input with signed,  $-\log$  p-values using rank-based Gene  
239 Ontology analysis (Wright et al., 2015).

240 *2.4. Modeling gene regulation as a function of epigenomic variation* – Using a Bayesian  
241 framework, Gaussian linear models were fitted in order to predict baseline gene expression ( $\log_2$   
242 counts per million or logCPM) and binomial generalized linear models were fitted to binary  
243 values for the presence of alternative transcripts (e.g., splicing) as functions of mean CpG  
244 methylation and mean chromatin accessibility of promoters, introns, exons, and interactions  
245 between these predictors. Linear models of DE were fitted to predict logFC as a function of DM  
246 in -1 kb promoters, introns, and exons, as well as logCPM, chromatin accessibility across genic  
247 features, and components of genic architecture such as the total length of genic feature types.  
248 Linear models of DEU included predictors for DM of the corresponding exon, DM of all exons  
249 and introns of the associated gene, exon number, logCPM, chromatin accessibility across genic  
250 features, and genic architecture.

251 All linear and generalized linear models were fitted using the R package *brms* v2.14.0, an  
252 R interface to the Stan programming language for specifying Bayesian models (Bürkner, 2017).  
253 All models were fitted with scaled Z-score transformations of continuous variables. Linear  
254 models of DE and DEU were fit with studentized model families to reduce prediction of  
255 artificially high or low outcome variables and were specified with weakly informative normal  
256 priors (mean = 0; SD = 0.5) for both slope ( $\beta$ ) and intercept parameters. Z-score transformations  
257 were used in order to improve model convergence and compare posterior distributions of  $\beta$   
258 parameters for predictors of different dependent variables such as DE and DEU. Weakly  
259 informative priors expressing a low probability of DNA methylation affecting gene regulation  
260 accounted for knowledge that DM associated with plasticity has exhibited negligible singular  
261 effects on gene regulation in most invertebrates. Posterior distributions were sampled using 4  
262 chains at 20,000 iterations each, including 5,000 warmup iterations.

263 Model selection was performed by (i) applying Bayes factors using the  
264 `bayesfactor_models` function in *bayestestR* v0.9.0 (Makowski, Ben-Shachar, & Lüdtke, 2019)  
265 to compare the likelihoods of models fit with iterative combinations of predictor variables  
266 excluding  $>3^{\text{rd}}$  order interactions and (ii) comparing the selected model to two additional,  
267 alternative models using k-fold cross validation via *rstanarm* v2.21.1 (Goodrich, Gabry, Ali, &  
268 Brilleman, 2020): a model of the outcome predicted by differential methylation alone and the  
269 selected model without its highest-order interaction term. Bayes factors are less likely to select  
270 complex models (Gronau & Wagenmakers, 2019) and were applied to a large number of  
271 varyingly complex models before the selected model's predictive strength was evaluated with k-  
272 fold cross validation. To account for variation in RRBS read coverage across the data, the  
273 selected model was then refit to include an error parameter for estimated methylation and



274 differential methylation that equaled the inverse CpG coverage of each gene or feature in the  
275 dataset. RRBS CpG coverage per feature is described in Supplemental Results for reported  
276 models. Posterior predictive checks were used to evaluate selected model predictions according  
277 to observed data. Effect significance was tested using probability of direction, a Bayesian  
278 corollary of the p-value (Makowski, Ben-Shachar, Chen, & Ludecke, 2019); fixed effects were  
279 deemed significant if 95% of their posterior distribution fell above or below 0. Inclusion Bayes  
280 factors were employed to test for the explanatory power of an effect by estimating the likelihood  
281 of observed data when fitted with a parameter relative to a null model excluding it (Hinne,  
282 Gronau, van den Bergh, & Wagenmakers, 2020). Diagnostic plots, QC information, and  
283 predictions of selected models are available in Supplemental Results. The specifications and  
284 relative likelihoods of selected and unselected models are available in the following GitHub  
285 repository: [https://github.com/snbogan/Sp\\_RRBS\\_ATAC](https://github.com/snbogan/Sp_RRBS_ATAC).

286

### 287 **3. Results**

288         The results of our study demonstrate (i) that differential DNA methylation likely bears  
289 gene regulatory effects during TGP in *Strongylocentrotus purpuratus* and (ii) that these effects  
290 are conditional upon chromatin accessibility and genic architecture. We observed positive  
291 correlations between baseline DNA methylation, transcript abundance, and the presence of  
292 alternative splice forms within genes. With regard to plastic changes in DNA methylation and  
293 gene regulation, differential GBM interacted with chromatin accessibility and genic architecture  
294 to affect both differential gene expression and differential exon use/splicing such that the  
295 strength and direction of DM's effects were contingent upon these additional genomic and  
296 epigenomic states. We describe these results in three sections below, focusing first on baseline

297 relationships between DNA methylation and transcription, followed by epigenetic and gene  
298 regulatory responses to experimental upwelling. Finally, we present the results of integrated  
299 epigenomic models of DNA methylation's gene regulatory effects during TGP.

300 *3.1. Associations between constitutive epigenomic states and transcription – GBM in S.*  
301 *purpuratus* prism larvae showed significant and positive correlations with gene expression level  
302 and the probability of associated alternative transcriptional variants. CpGs within -1 kb  
303 promoters, exons, and introns exhibited mean methylation levels of 34.70%, 43.21%, and  
304 44.64%, respectively. Mean promoter methylation demonstrated a significant, albeit weak,  
305 negative effect on the expression (logCPM) of corresponding genes. By contrast, mean exon and  
306 intron methylation both exhibited stronger, positive effects on expression. Genes that were  
307 highly methylated in either exons or introns were ~2x more expressed than unmethylated genes  
308 (Fig. 1A). Exon and intron methylation also exhibited a significant, antagonistic interaction such  
309 that genes with high methylation at both introns and exons were not more expressed than genes  
310 with high methylation at only introns or exons. Interestingly, accounting for TSS accessibility in  
311 models of logCPM resulted in the loss of a significant effect of intron methylation on gene  
312 expression. Lastly, genes with high levels of intron or exon methylation were more likely as to  
313 exhibit transcript variants consistent with alternative splicing, alternative TSS, and/or exon  
314 skipping. The relationship between the probability of transcript variants and methylation at  
315 promoters was insignificant (Fig. 1B).

316 Chromatin accessibility at TSS, exons, and introns were also correlated with gene  
317 expression level, but not with the probability of transcriptional variants. However, selected  
318 models of logCPM did not include parameters related to chromatin accessibility and such  
319 parameters also yielded low inclusion Bayes factors. Chromatin accessibility was enriched

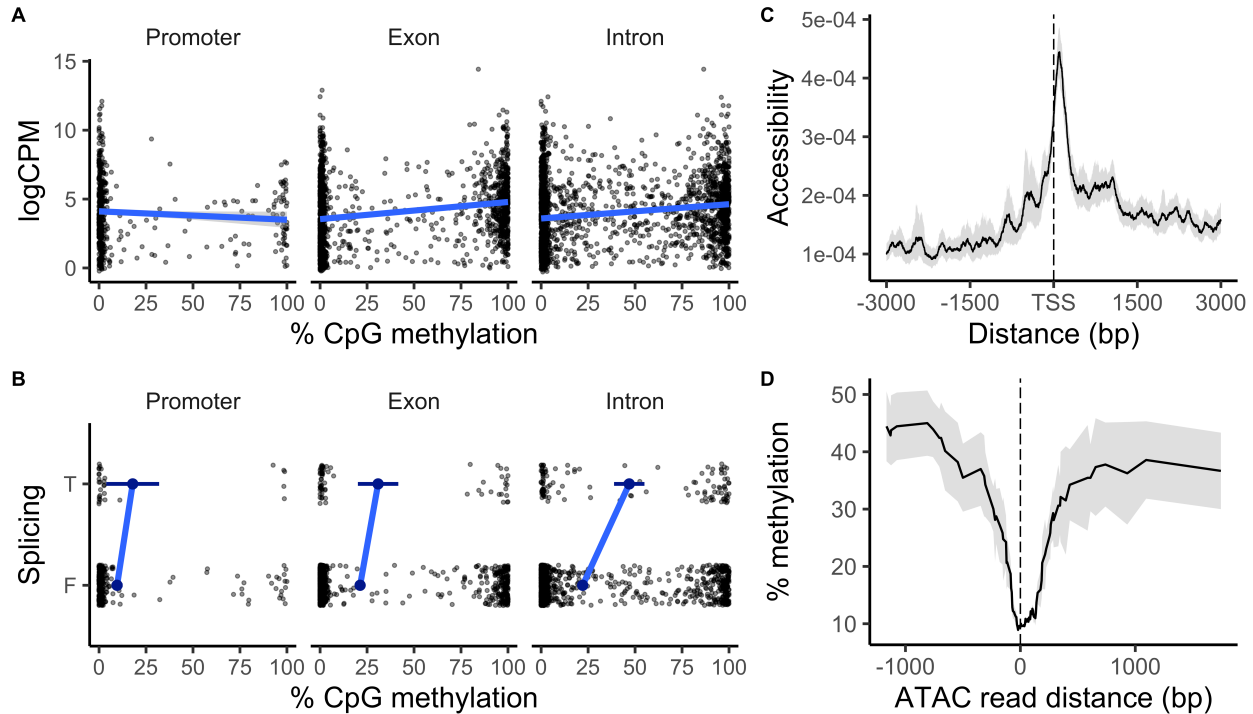

320

321 **Figure 1 | Relationships between constitutive DNA methylation, expression, and chromatin accessibility in**  
322 **larval *Strongylocentrotus purpuratus*.** (a) Median methylation averaged across CpGs in the promoter, introns, and  
323 exons per gene are plotted against transcript abundance and (b) whether a gene exhibited transcript variants. Error  
324 bars depict  $\pm 95\%$  CI. (c) Loess trend of mean ATAC-seq read density (i.e., chromatin accessibility)  $\pm 95\%$  CI is  
325 plotted across distance to TSS sites. (d) 50 bp sliding window averages of CpG methylation  $\pm 95\%$  CI are plotted  
326 across distance to accessible chromatin regions for which ATAC-seq reads intersect from all replicate samples.  
327

328 proximal to TSS (Fig. 1C) but was greatest in introns, which exhibited a mean of  $0.19 \pm 0.11$

329 ATAC-seq reads per bp compared to  $0.043 \pm 0.001$  and  $0.039 \pm 0.043$  in TSS and exons,

330 respectively. Open chromatin regions showed  $\sim 30\%$  less CpG methylation than inaccessible

331 regions (Fig. 1D). Gene-level intron and exon methylation showed no relationship with

332 chromatin accessibility of either genic feature (Fig. S1A). Chromatin accessibility within  $\pm 500$

333 bp of TSS and gene bodies both showed significant and positive correlations with gene

334 expression, with TSS accessibility exhibiting an effect that was 32.98% stronger than gene body

335 accessibility (Fig. S1B). TSS accessibility did exhibit a significant and positive correlation with

336 the probability of alternative transcriptional variants. This effect was insignificant after

337 accounting for intron methylation however. Thus, intron methylation was the only significant  
338 predictor of alternative splicing events.

339 *3.2. Transcriptional and epigenetic responses to environmental variation – Maternal and*  
340 developmental exposure to experimental upwelling induced DE, as well as DEU consistent with  
341 alternative splicing and exon skipping in prism larvae of *S. purpuratus*. As reported by Strader et  
342 al. 2020, differential CpG methylation was observed in response to maternal upwelling, but no  
343 DM was observable under developmental upwelling. This distinction between maternal and  
344 developmental effects remained constant after quantifying DM averaged across genes'  
345 promoters, exons, and introns.

346 Developmental upwelling exposure induced 2,263 upregulated and 2,459 downregulated,  
347 differentially expressed genes (DEGs). Maternal exposure induced 1,380 upregulated and 1,025  
348 downregulated DEGs (Fig. 2). After applying a log<sub>2</sub>FC cutoff of > 1.0, 309 significant  
349 developmental DEGs were retained while 245 maternal DEGs were retained. Although the  
350 developmental treatment gave rise to a greater number of DEGs, absolute logFCs of DE among  
351 maternal DEGs were significantly higher than absolute logFCs of developmental DEGs by  
352 10.45%. Functional enrichment of biological process, molecular function, cellular component  
353 GO terms among DEGs was observed in response to maternal and developmental treatments and  
354 is extensively reported by Strader et al. 2020.

355 Substantially less DEU occurred in response to experimental upwelling relative to DE.  
356 Significant DEU was evaluated using both gene- and exon-level tests. Developmental upwelling  
357 induced 78 differentially spliced genes (DSGs) while maternal upwelling induced 121 DSGs,  
358 with 16 DSG genes shared between treatments. 43 and 49 genes were both differentially  
359 expressed and differentially spliced in response to developmental upwelling and maternal

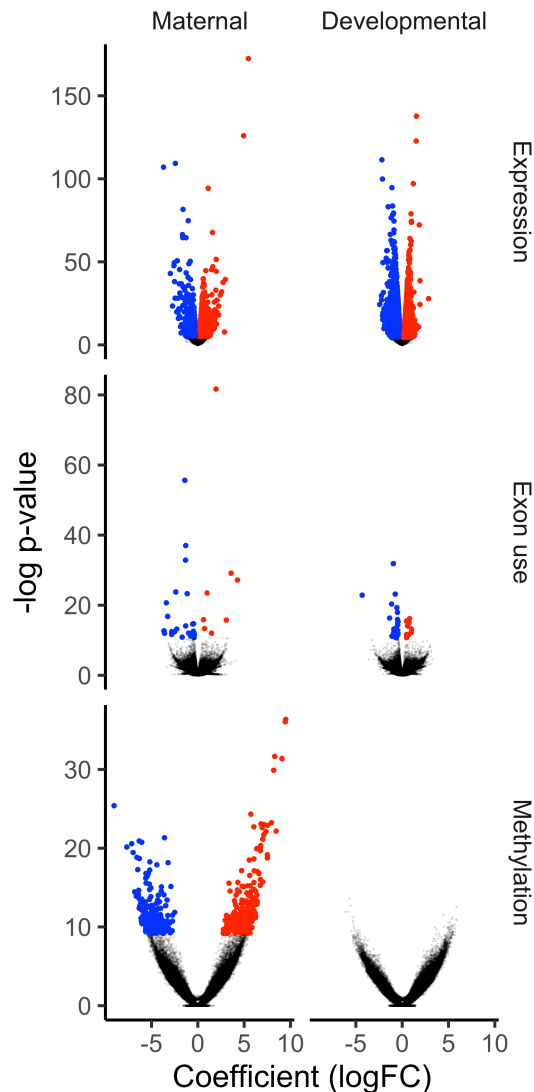

**Figure 2 | Molecular responses to developmental and maternal upwelling exposure.** (top) Volcano plots of differential expression depicting genewise  $-\log_2$  p-values,  $\log_2$ FC, and significant differential expression (color). (middle) Volcano plots of differential exon use or DEU (e.g., splicing) depicting exon-level  $-\log_2$  p-values, DEU coefficients, and significant DEU (color). (bottom) Volcano plots of differential CpG methylation depicting CpG-level  $-\log_2$  p-values,  $\log_2$ FC of differential methylation, and significant differential methylation (color). Red and blue points depict significant positive and negative coefficients, respectively (FDR < 0.05).

upwelling, respectively (Fig. S2). Significant DEU was detected among 44 exons in response to developmental upwelling: 14 upregulated or “included” exons and 30 downregulated or “dropped” exons. DEU in response to maternal upwelling occurred in 47 exons: 12 included and 35 dropped exons (Fig. 2). The molecular function (MF) GO terms ‘structural molecule activity’ and ‘structural constituent of ribosome’ and the

382 biological process terms ‘obsolete GTP catabolic process’, ‘small GTPase mediated signal transduction’, and ‘cellular amide metabolic process’ were enriched among differentially spliced exons in response to both maternal and developmental treatments. Exons differentially spliced under the maternal treatment were also enriched for the biological processes (BP) ‘cellular localization’ and ‘nuclear transport’ among others (see Supplemental Material).

388

389 In response to maternal upwelling, 288 CpGs were hypermethylated and 233 were  
390 hypomethylated. Zero CpGs were differentially methylated in response to developmental  
391 upwelling (Fig. 2). This effect was distinct from DE and DEU, which both exhibited greater or  
392 equal variation in response to developmental upwelling compared to maternal upwelling.  
393 Functional enrichment among differentially methylated genes is described in detail by Strader et  
394 al 2020.

395 *3.3. Chromatin state, genic architecture, and differential methylation interactively*  
396 *influenced transcriptional responses to environmental variation* – The strength of differential  
397 GBM's effect on DE was conditional upon chromatin accessibility and transcript abundance.  
398 Differential GBM across whole genes did not affect DE, while intron DM was significantly  
399 associated with DE. The selected model of DE as a function of intron DM under maternal  
400 upwelling included a significant three-way interaction between intron DM, TSS accessibility,  
401 and logCPM. Intron DM had higher absolute effects on DE among genes with poorly accessible  
402 TSS. These effects were positive among genes with low expression and negative for highly  
403 expressed genes (Fig. 3A). The inclusion Bayes factor for the interaction between intron DM,  
404 logCPM, and TSS accessibility was 3.84 (Fig. 3B). A Fishers exact test demonstrated that genes  
405 in the lowest logCPM quartile and lowest quartile of TSS accessibility were enriched with MF  
406 GO terms that included 'nucleotidyltransferase activity' and 'cytoskeletal motor activity', two  
407 MF terms that were also enriched among genes with CpGs that were differentially methylated  
408 under maternal upwelling (Strader et al., 2020). The biological process GO terms 'plasma  
409 membrane bounded cell projection assembly' and 'movement of cell or subcellular component'  
410 were also enriched among genes with low TSS accessibility and expression, among others (see  
411 Supplemental Material). Genes in the lowest TSS accessibility quartile and highest logCPM  
412

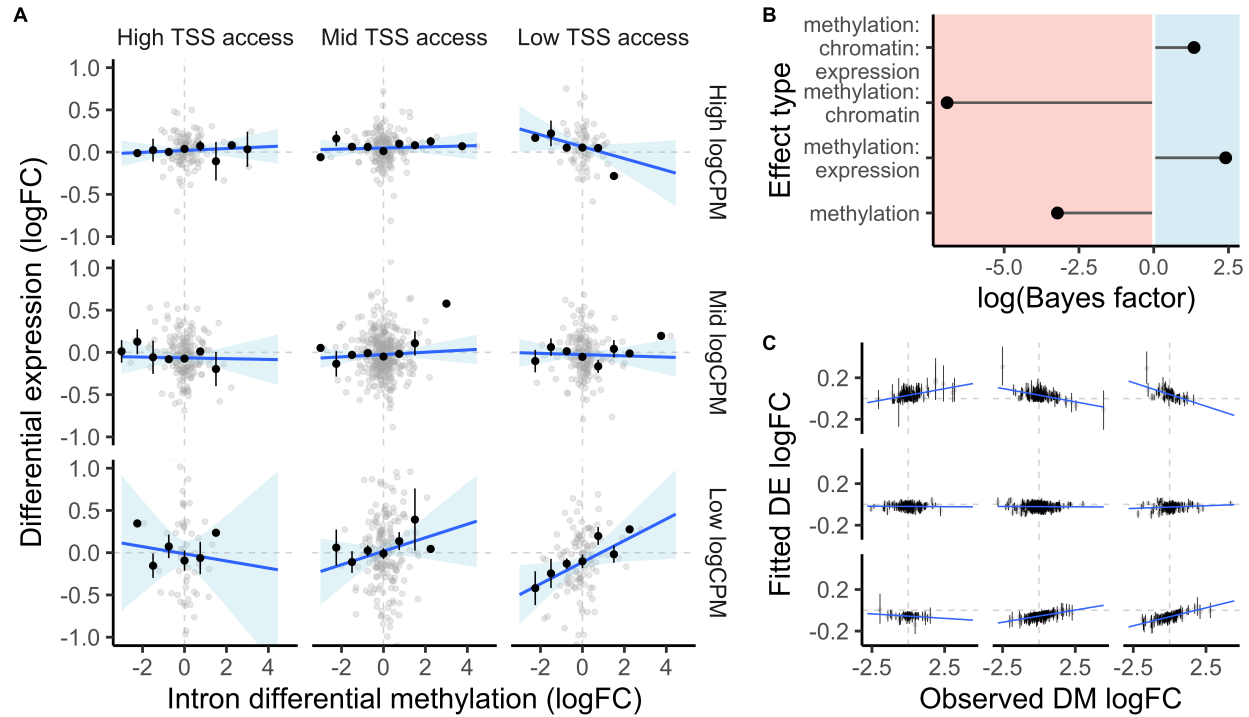

413  
 414 **Figure 3 | Differential intron methylation affected expression conditional upon TSS accessibility and**  
 415 **transcript abundance.** (a) Differential gene expression under maternal upwelling is plotted against mean intron  
 416 differential methylation. Rows and columns group data based on transcript abundance and TSS accessibility  
 417 quartiles, respectively. First and last rows/columns denote highest and lowest quartiles. Linear regressions are fitted  
 418 across observed values. Average logFC across binned intron differential methylation is plotted as black points  $\pm$  SE.  
 419 (b) Log-scale inclusion Bayes factors depicting the probability of observed data under a parameter, including the  
 420 interaction plotted in panel A. (c) logFC values fitted by the selected model of differential expression as a function  
 421 of intron differential methylation. Error bars represent  $\pm$  95% credibility intervals. Columns, rows, and the x-axis  
 422 depict binned TSS accessibility, logCPM, and observed intron differential methylation as presented in panel A.  
 423

424 quartile were enriched with the MF terms ‘threonine-type endopeptidase activity’, ‘transcription  
 425 regulator activity’, and ‘calcium ion binding’. An Intron DM standard deviation of +1.00  
 426 corresponded to a DE standard deviation of  $+0.26 \pm 0.12$  among genes in the lowest quartile of  
 427 TSS accessibility and lowest logCPM quartile and  $-0.14 \pm 0.09$  for low TSS accessibility, high  
 428 logCPM genes. Lastly, some model iterations in the top 25% of marginal likelihoods indicated  
 429 that intron length interacted with intron DM to affect expression. Intron hypermethylation of  
 430 genes in the top quartile of intron length silenced expression while genes in the middle-to-lowest

431 quartiles of intron length showed enhanced expression as a result of intron hypermethylation  
432 (Fig. S3), though the inclusion Bayes factor for this interaction was negligible (BF = 1.67).

433 Differential exon methylation responding to maternal upwelling interacted with gene  
434 body accessibility and genic architecture to affect DEU attributable to variation in alternative  
435 splicing and/or exon skipping. Selected models of DEU yielded a significant three-way  
436 interaction between exon DM, exon accessibility, and the total genic intron length. Both the  
437 strength and direction of exon DM's effect on DEU was conditional upon exon accessibility and  
438 intron length. Positive correlations between exon DM and DEU were observed among exons  
439 from genes with poor exon accessibility while negative correlations were observed among exons  
440 from genes with highly accessible exons. Absolute effect strengths of exon DM on DEU were  
441 stronger among genes with longer introns (Fig. 4A). The inclusion Bayes factor of exon DM,  
442 exon accessibility, and intron length's interactive effect on DEU equaled 13.03 (Fig. 4B). Exons  
443 from genes with long introns in the lowest quartile of exon accessibility exhibited a Z-score  $\beta$  of  
444  $+0.43 \pm 0.20$ . Exons from genes with long introns in the highest quartile of exon accessibility  
445 bore an effect strength of  $-0.12 \pm 0.14$ . Genes in the lowest quartile of exon accessibility and  
446 highest intron length quartile were enriched with the MF GO terms 'calcium ion binding',  
447 'cytoskeletal motor activity', and 'ATPase activity', among others, and the BP terms 'purine-  
448 containing compound metabolic process', 'microtubule-based movement', and 'cell adhesion'.  
449 Genes with long introns and high exon accessibility were also enriched with the MF term  
450 'calcium ion binding', as well as 'transporter activity', 'small molecule binding', and others, and  
451 enriched BP terms including 'cell adhesion', 'localization', 'regulation of intracellular signal  
452 transduction' (see Supplemental Material).



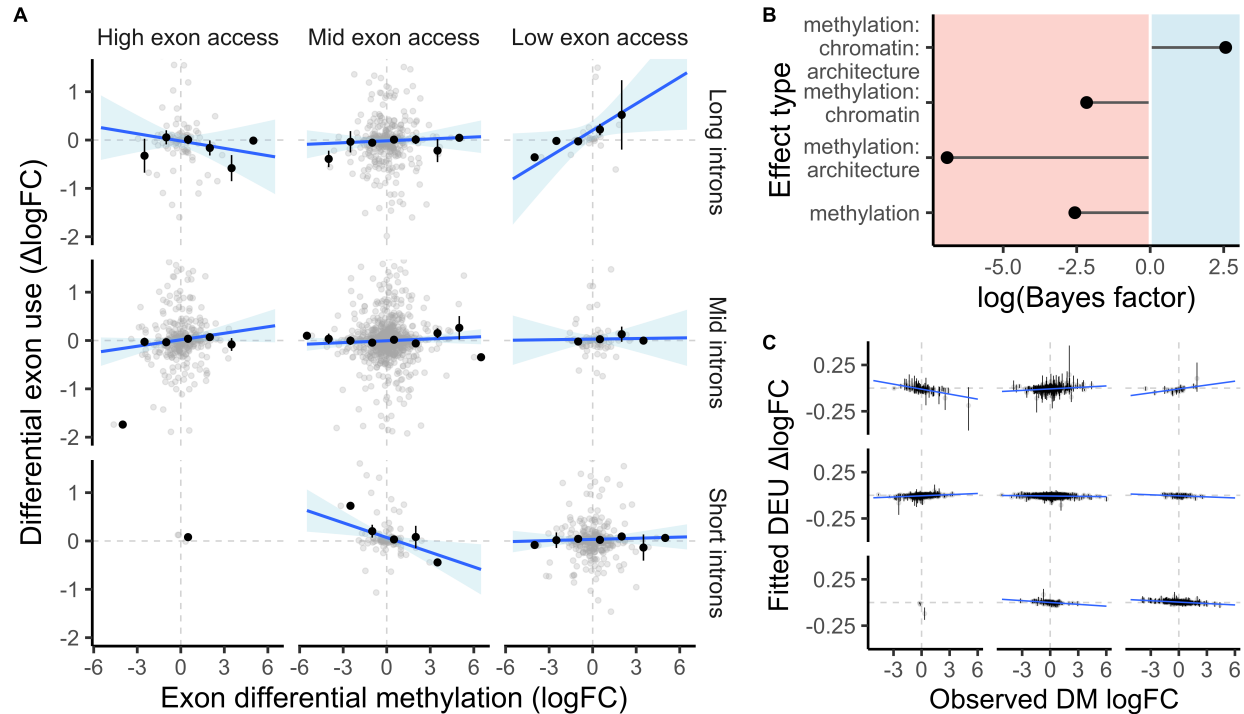

453

454 **Figure 4 | Differential exon methylation affected splicing conditional upon exon accessibility and genic**  
 455 **architecture.** (a) Differential exon use under maternal upwelling is plotted against mean exon differential  
 456 methylation. Rows and columns group data based on total genic intron length and exon accessibility quintiles. First  
 457 and last rows/columns denote highest and lowest quintiles. Linear regressions are fitted across observed values and  
 458 are absent in the bottom left panel due to a low representation of observations. Average  $\Delta\log\text{FC}$  across binned exon  
 459 differential methylation is plotted as black points  $\pm$  SE. (b) Log-scale inclusion Bayes factors depicting the  
 460 probability of observed data under a parameter, including the interaction plotted in panel A. (c)  $\Delta\log\text{FC}$  values fitted  
 461 by the selected model of differential exon use as a function of exon differential methylation. Error bars represent  $\pm$   
 462 95% credibility intervals. Columns, rows, and the x-axis depict binned exon accessibility, intron length, and  
 463 observed exon differential methylation as presented in panel A. Points represent exons in panels A and C.  
 464

#### 465 4. Discussion

466 We sought to characterize relationships between differential methylation and  
 467 transcriptional plasticity in the purple urchin *Strongylocentrotus purpuratus*, a species for which  
 468 DNA methylation appears to play a role in transgenerational plasticity (Strader et al., 2020;  
 469 Strader et al., 2019; Wong et al., 2019). *S. purpuratus* induces both significant differential  
 470 expression and differential exon use (e.g., alternative splicing) in response to developmental and  
 471 maternal exposure to experimental upwelling. Furthermore, differential gene body methylation in

472 *S. purpuratus* larvae induced by maternal exposure to this ecologically relevant stressor exhibits  
473 significant and strong effects on DE and DEU among subsets of genes contingent upon  
474 chromatin accessibility and genic architecture (e.g., genomic feature type and genic feature  
475 length). Observed changes in expression and exon use under maternal conditioning were 4x and  
476 13x more likely, respectively, when accounting for interactions between differential GBM,  
477 chromatin accessibility, and genic architecture. These results support the hypotheses that DM  
478 induced during TGP elicits multiple gene regulatory effects in *S. purpuratus* and, secondly, that  
479 these effects are conditional upon genomic and epigenomic features extrinsic of DNA  
480 methylation. Here we (i) discuss potential mechanisms to explain interactions between DNA  
481 methylation, chromatin accessibility, and genic architecture, (ii) interpret our results in the  
482 context of *S. purpuratus* and invertebrate physiological ecology, and (iii) highlight questions to  
483 be pursued in future studies of ecological epigenomics in metazoans.

484 *4.1. Relationships between DNA methylation, chromatin accessibility, and gene*  
485 *expression in Strongylocentrotus purpuratus and other invertebrates* – Baseline patterns of  
486 genomic methylation, chromatin accessibility, transcription, and the relationships between these  
487 processes in *S. purpuratus* were consistent with those typically observed in other invertebrate  
488 lineages (Bonasio et al., 2012; Dixon et al., 2018; Downey-Wall et al., 2020; Flores et al., 2012;  
489 Gao et al., 2012; Gatzmann et al., 2018; Glastad et al., 2016; Johnson et al., 2020; Kvist et al.,  
490 2018; Li et al., 2018; Li-Byarlay et al., 2013; Libbrecht et al., 2016; Song et al., 2017; Zemach et  
491 al., 2010). Our results also further illuminate the relationship between baseline intragenic  
492 methylation and gene expression in metazoans; we observed an antagonistic relationship  
493 between intron and exon methylation in *S. purpuratus* such that a saturation of methylation in  
494 one genic feature reduced the additive effect of methylation on expression by the other. Exon

495 methylation was significantly correlated with gene expression regardless of intron methylation,  
496 but the effect of intron methylation was conditional upon low exon methylation. Several  
497 competing and non-competing hypotheses have been put forward to explain positive correlations  
498 between GBM and gene expression. Firstly, GBM inhibition in metazoans can reduce gene  
499 expression, causally linking GBM and expression (Lindeman et al., 2019; Yang et al., 2014).  
500 Recent advances in invertebrate epigenomics suggest that intragenic DNA methylation is bound  
501 by methyl-DNA-binding domain protein 2/3, which recruits acetyltransferases to promote  
502 H3K27 acetylation and initiate transcriptional elongation (Xu et al., 2021). Non-competing  
503 hypotheses posit that GBM may correlate with gene expression because it supports sequence  
504 conservation and transcriptional homeostasis. For example, genes with intragenic  
505 hypermethylation (i) are less accessible on average in at least some invertebrates (Gatzmann et  
506 al., 2018), which can protect them from mutation (Shi et al., 2016), and (ii) evolve at a slower  
507 rate across invertebrate lineages (Hunt, Brisson, Yi, & Goodisman, 2010; Park et al., 2011; Sarda  
508 et al., 2012). Intragenic methylation can also ensure a reduction in spurious transcription at  
509 noncanonical TSS, promoting transcriptional homeostasis (Neri et al., 2017). The singular effect  
510 of exon methylation on baseline expression in *S. purpuratus*, and the absence of a singular effect  
511 attributed to introns, suggest a unique association between exon methylation and expression.  
512 Conversely, the antagonistic interaction between exon and intron methylation may be indicative  
513 of functional redundancy for a secondary association between GBM and gene expression. For  
514 example, it is possible that exon methylation is more strongly associated with reduced intragenic  
515 accessibility, preventing mutation in coding regions of conserved genes, while exon and intron  
516 methylation may contribute relatively equally in directing transcriptional elongation to canonical  
517 TSS by preventing intragenic accessibility.

518 Intron methylation was also positively correlated with the prevalence of transcript  
519 variants among *S. purpuratus* genes consistent with associations between GBM and alternative  
520 splicing in other metazoans. Intragenic hypermethylation recruits methyl CpG binding protein 2  
521 to splice junctions, which promotes exon recognition and, in some cases, intron retention via  
522 alterations to the elongation rate of RNA pol II (Maunakea, Chepelev, Cui, & Zhao, 2013; Wong  
523 et al., 2017). Considering existing evidence that exon methylation is positively associated with  
524 exon inclusion, it is surprising that intron methylation was associated with splicing in *S.*  
525 *purpuratus* while exon methylation was not. Relationships between the inclusion of specific  
526 exons or introns and their baseline methylation may still exist in *S. purpuratus*. We chose to  
527 model genewise averages of median CpG methylation at exons and introns as predictors of splice  
528 variation rather than fitting models of exon- or intron-specific use. This decision was made  
529 because our short read RNA-seq approach allowed for analyses of DEU between treatment  
530 groups, but not baseline exon use independent of treatment; we could not determine whether a  
531 methylated exon or intron was more likely to be constitutively skipped or included in a  
532 transcript. A more resolute quantification of GBM's effect on alternative splicing in *S.*  
533 *purpuratus* or other invertebrates would be achieved by incorporating BS-seq with long read  
534 RNA-seq to enable isoform-specific read counting.

535 Patterns of chromatin accessibility and its relationship with gene expression in *S.*  
536 *purpuratus* were typical of other invertebrates and metazoans. Models of logCPM that included  
537 TSS or exon accessibility as predictors demonstrated significant, positive correlations with gene  
538 expression. However, variables related to chromatin accessibility were not included in the  
539 selected model of logCPM and yielded low Bayes factors for inclusion. Indeed, chromatin  
540 accessibility is necessary for the initiation of transcriptional elongation at canonical TSS

541 (Klemm, Shipony, & Greenleaf, 2019). No relationships were observed between chromatin  
542 accessibility at genic features and the presence of transcript variants. Alternatively spliced exons  
543 exhibit more accessibility and less nucleosome occupancy than constitutively retained exons  
544 (Naftelberg, Schor, Ast, & Kornblihtt, 2015), inconsistent with the lack of relationship between  
545 chromatin accessibility and the prevalence of transcript variants in *S. purpuratus*. Finally, our  
546 observation that CpG methylation precipitously declined proximal to open regions of chromatin  
547 is consistent with findings in other invertebrates, vertebrates, and plants (Gatzmann et al., 2018;  
548 Lhoumaud et al., 2019; Zhong et al., 2021) and is characteristic of methylation CpG binding  
549 protein's interactions with repressive chromatin factors (Klose & Bird, 2006).

550 *4.2. Differential methylation's effect on expression depends on chromatin state and genic*  
551 *architecture* – Our finding that DM induced by maternal environment affected DE and DEU  
552 conditional upon chromatin accessibility and genic architecture supports the hypotheses (i) that  
553 DM possesses gene regulatory roles in invertebrates during plastic responses to the environment  
554 and (ii) that these effects are contingent upon additional epigenomic and genomic states. This  
555 degree of complexity underlying differential GBM's functions juxtaposes the simple relationship  
556 between promoter DM and expression exhibited across vertebrates (Boyes & Bird, 1992). Such  
557 complexity is expected, however. In model species for which GBM has been frequently  
558 investigated, its potential effects are numerous, interrelated, and remain a point of active debate  
559 (Zilberman, 2017). Our results provide additional evidence that GBM has multiple non-mutually  
560 exclusive functions in metazoans, extending current knowledge in that GBM's multivariate  
561 effects may be shaped by a multifactorial epigenomic space. While a great deal remains to be  
562 uncovered about the gene regulatory roles of GBM in metazoans, several key results arose from

563 our study that may aid in understanding the physiological significance of epigenomic regulation  
564 associated with responses to environmental stress and phenotypic plasticity.

565 The effect of GBM on DE was strongest among genes with high absolute intron DM and  
566 low TSS accessibility, with transcript abundance influencing the direction of effect (Fig. 3A).  
567 We also observed that introns were significantly more accessible than exons and promoters and  
568 that intron methylation shared stronger correlations with the occurrence alternative splicing  
569 events than exon methylation (Fig 1B). These feature-dependent effects on both baseline and  
570 plastic patterns of gene regulation underscore the unique roles that exon and intron methylation  
571 may possess. While our analyses indicate, with strong likelihood, that the regulatory role of  
572 intron DM is dependent on TSS accessibility and expression level, the mechanisms by which  
573 intron methylation contributes to gene regulation, and how those mechanisms differ from exon  
574 DM, remain unresolved.

575 Previous studies have identified effects of intron DM on DE outside of invertebrates and  
576 interactions between GBM and TSS accessibility in their effects on baseline expression, but there  
577 is strong potential for such effects to phylogenetically vary. GBM is positively correlated with  
578 TSS accessibility measured using a putative approach for several arthropods (Lewis et al., 2020),  
579 negatively correlated with TSS accessibility as demonstrated by ATAC-seq in the crustacean  
580 *Procrambus virginalis* (Gatzmann et al., 2018) and uncorrelated with TSS accessibility in *S.*  
581 *purpuratus* (Fig. S4). With regard to intron methylation, CpG methylation of large introns can be  
582 required for gene expression (Rigal, Kevei, Pelissier, & Mathieu, 2012). Conversely, methylation  
583 of first introns can be negatively correlated with gene expression, suggesting a distinct role  
584 relative to introns 2 –  $n$  in plants and vertebrates (Anastasiadi, Esteve-Codina, & Piferrer, 2018;  
585 Rose, 2008; Tan, 2010). The mean intron length of *S. purpuratus* is 1.753 kb (Tu, Cameron,

586 Worley, Gibbs, & Davidson, 2012) and, as we have demonstrated, average % CpG methylation  
587 is relatively even across introns and exons. Basal invertebrates such as placozoans and sponges  
588 exhibit shorter intron lengths than higher order invertebrates such as deuterostomes (McCoy &  
589 Fire, 2020). Furthermore, the evenness of CpG methylation between introns and exons of *S.*  
590 *purpuratus* is distinct from most other invertebrates for which exon methylation is greater  
591 (Downey-Wall et al., 2020; Lewis et al., 2020; Li et al., 2018) but comparable to other  
592 echinoderms (Yang, Zheng, Sun, & Chen, 2020). Despite our support in *S. purpuratus* for the  
593 hypothesis that DNA methylation's gene regulatory roles during plasticity are dependent  
594 additional epigenomic and genomic states, it is important to underscore that the nature of intron  
595 methylation's effect on DE and its interactions with TSS accessibility may vary across  
596 invertebrate phyla.

597 DE induced by maternal stress was most positively affected by intron DM among lowly  
598 expressed genes with low TSS accessibility that were enriched for molecular functions including  
599 'nucleotidyltransferase' and 'cytoskeletal motor activity', molecular functions that were also  
600 enriched among genes that were differentially methylated following maternal upwelling.  
601 'Nucleotidyltransferase activity' was also enriched among genes that were downregulated in  
602 response to maternal upwelling. (Strader et al., 2020). Therefore, it is possible that the DM and  
603 DE of some gene families were attributed to interactions between methylation, chromatin  
604 accessibility, and expression level.

605 Importantly, intron DM exhibited a negative correlation with DE among genes with low  
606 TSS accessibility, but high expression. Bidirectional effects of differential GBM on DE could  
607 help explain why past associations between differential GBM and expression have been  
608 negligible in invertebrates. Multiple hypotheses may explain how the directionality of intron

609 DM's association with DE changed according to expression level. Introns possess both  
610 enhancing and silencing effects on gene expression across eukaryota (Rose, 2008; Rose, 2018).  
611 Intragenic enhancers are predominantly located in introns and their methylation can be  
612 negatively correlated with expression in some eukaryotic lineages (Blattler et al., 2014).  
613 Enhancer profiling in developing *S. purpuratus* has revealed correlations between enhancer  
614 activity and gene expression, indicating that a proportion of highly expressed genes in early  
615 prism-stage larvae may correspond to a greater number of activated enhancers (Khor, Guerrero-  
616 Santoro, Douglas, & Ettensohn, 2021). Long introns are also enriched with conserved regulatory  
617 elements such as transcriptional enhancers (Haddrill, Charlesworth, Halligan, & Andolfatto,  
618 2005; Park et al., 2011), potentially explaining the silencing effect of intron DM we observed  
619 among *S. purpuratus* genes with long intron lengths (Fig. S3). Future work should test whether  
620 intron hypermethylation induces downregulation of transcripts enriched with intragenic  
621 enhancers and whether positive associations between intron DM and DE are attributable to  
622 MBD-binding at methylated gene bodies, promoting histone H3K27 acetylation and gene  
623 expression (Xu et al., 2021).

624 *4.3. Effects of differential methylation on splicing are conditional upon chromatin and*  
625 *genic architecture states* – Alternative splicing diversifies the proteome and is an essential and  
626 conserved gene regulatory mechanism (Keren, Lev-Maor, & Ast, 2010). Changes in exon use  
627 under stress can be attributable to alterations in both constitutive and alternative splicing events  
628 (Biamonti & Caceres, 2009). In response to maternal upwelling, differential GBM in *S.*  
629 *purpuratus* larvae interacted with chromatin state and genic architecture to potentially influence  
630 alternative splicing and/or exon skipping. A three-way interaction between exon DM, exon  
631 accessibility, and genic intron length affected DEU such that (i) the absolute effect of exon DM



632 was strongest among genes with greater total intron lengths and (ii) DEU of poorly accessible  
633 exons positively correlated with exon DM while the DEU of accessible exons negatively  
634 correlated with exon DM. To our knowledge, our results mark the first evidence in an  
635 invertebrate of a significant association between DM and exon inclusion responding to  
636 environmental variation.

637         The effect of total intron length on DEU aligns with observations that alternative splicing  
638 is more pervasive among long genes (Flores et al., 2012; Grishkevich & Yanai, 2014), whose  
639 size is largely attributable to intron length in *S. purpuratus* (Tu et al., 2012). Long genes  
640 involved in cellular structure and cell adhesion are targets of alternative splicing, producing a  
641 diversity of protein isoforms that can modify protein-protein complexes that construct or regulate  
642 the cytoskeleton, organelle organization, and the extracellular matrix across cell types,  
643 developmental stages, and physiological states as evidenced in multiple model systems (Belkin  
644 et al., 1997; Exposito, D'Alessio, & Ramirez, 1992; Kalsotra & Cooper, 2011; Leung, Zheng,  
645 Prater, & Liem, 2001; O'Leary, Lasda, & Bayer, 2006). Long genes with poorly accessible exons  
646 in *S. purpuratus* were enriched with 'protein-protein dimerization' MF GO terms and BP terms  
647 such as 'cellular component assembly' and 'organelle organization'. Similar to genes whose DE  
648 was most affected by DM, these genes were also enriched with signaling receptor and signal  
649 transduction functions. ~65% of exons with the strongest positive associations between DM and  
650 DEU (e.g., high genic intron length and low exon accessibility) came from genes involved in  
651 organelle organization, cytoskeletal structure, and the extracellular matrix.

652         The positive correlation between exon DM and DEU in genes with inaccessible exons  
653 was expected as hypermethylation at alternatively spliced exons has generally been associated  
654 with their inclusion in transcripts (Flores et al., 2012; Shayevitch, Askayo, Keydar, & Ast, 2018).

655 As stated however, the direction of exon methylation's effect on splicing was influenced by  
656 chromatin accessibility; accessible exons exhibited a negative correlation between DEU and  
657 exon DM. While our study cannot derive the exact mechanism by which exon DM and  
658 accessibility interacted to affect exon use, several lines of evidence demonstrate their joint  
659 influence on alternative splicing. For example, the methyl-binding protein MeCP2 links splicing,  
660 DNA methylation, and chromatin state. MeCP2 aids in the recognition of alternatively included,  
661 methylated exons resulting in a positive correlation between methylation and inclusion among  
662 MeCP2-regulated exons (Lev Maor, Yearim, & Ast, 2015). MeCP2 also interacts with  
663 nucleosomes, and its genomic positioning is associated with H3K27Me3, a histone mark related  
664 to chromatin inaccessibility (Yin et al., 2021). Thus, the negative correlation between exon DM  
665 and DEU among genes with inaccessible exons could result from MeCP2 regulation. Methylated  
666 exons that are regulated by the transcriptional repressor CTCF experience skipping rather than  
667 inclusion. CTCF induces exon inclusion, but its binding to exons is inhibited by DNA  
668 methylation, resulting in a negative correlation between methylation and inclusion (Lev Maor et  
669 al., 2015). CTCF binding motifs are associated with increased chromatin accessibility (Jain, Ba,  
670 Zhang, Dai, & Alt, 2018). Thus, genes with accessible exons for which a positive correlation  
671 exists between exon DM and DEU may be regulated by CTCF. CTCF is conserved and  
672 expressed in *S. purpuratus* (Gomez-Marin et al., 2015) and MeCP2 is present in the *S.*  
673 *purpuratus* genome assembly and transcriptome.

674

675

676

677

678 **5. Conclusion**

679           Variation in DNA methylation appears to be a component of molecular responses by  
680 many invertebrates to predicted global change including ecologically critical, threatened groups  
681 such as stony corals (Putnam et al., 2016) and pteropods (Bogan, Johnson, & Hofmann, 2020) or  
682 detrimental invasive species (Hawes et al., 2018). Given the heritability of DNA methylation in  
683 some invertebrate clades (Liew et al., 2020), exacting its transcriptional and phenotypic  
684 consequences is critical for understanding the mechanistic basis of TGP. Our findings (i) provide  
685 quantitative support for the hypothesis that gene regulation by differential GBM in *S. purpuratus*  
686 is affected by additional epigenomic and genomic states and (ii) indicate that these effects  
687 influence both gene expression and mRNA splicing. The majority of ecological epigenomic  
688 studies in metazoans have focused on the singular effects of DM on expression, likely due to the  
689 predictive power of promoter methylation in vertebrates (Boyes & Bird, 1992). However, DNA  
690 methylation is not a silver bullet to predict transcriptional changes by *S. purpuratus* in response  
691 to environmental variation. Rather, it is likely one cog in the epigenomic machinery contributing  
692 to plasticity in gene expression and alternative splicing. A shift toward integrated studies  
693 combining DNA methylation, chromatin accessibility, and genomic/genic architecture may be  
694 necessary to accurately quantify non-genetic sources of transcriptional and phenotypic variation  
695 in invertebrates and other eukaryotes.

696

697

698

699

700

701 **Funding**

702 This research was funded by a United States National Science Foundation award (IOS-  
703 1656262) to GEH. In addition, diving and boating resources were provided by the Santa Barbara  
704 Coastal Long Term Ecological Research program (NSF award OCE-1831937; Director: Dr.  
705 Robert Miller).

706

707 **Acknowledgements**

708 We thank Juliet Wong, Logan Kozal, Terence Leach, Jannine Chamorro, and Maddie  
709 Housh for their assistance in executing the culturing experiment from which this study is  
710 derived. We are also grateful for insight and comments provided by Steven Roberts and his lab  
711 on this project's early results. Lastly, this work would not have been possible without boating  
712 and collection assistance provided by Clint Nelson of the Santa Barbara Channel Long Term  
713 Ecological Research program and Christophe Pierre, Director of Marine Operations at UC Santa  
714 Barbara.

715

716 **Author Contributions**

717 GEH conceived the original design and scope of the experiment. SNB, MES, and GEH  
718 conceived hypotheses and analytical approaches. MES led experimental execution and prepared  
719 DNA and RNA for sequencing. SNB and MES performed bioinformatic analyses. SNB wrote  
720 the manuscript with contributions from MES and input from GEH. All authors have read and  
721 approved the final manuscript.

722

723

724 **Data Availability**

725           Raw RNA-seq and RRBS fastq files associated with this study are available through the  
726 NCBI Short Read Archive under the accession PRJNA548926. Scripts associated with trimming,  
727 mapping, and counting RNA-seq reads and CpG methylation are available in the following  
728 GitHub repository: [https://github.com/mariestrader/S.purp\\_RRBS\\_RNAseq\\_2019](https://github.com/mariestrader/S.purp_RRBS_RNAseq_2019). Code  
729 corresponding to all analyses reported in this study, their intermediate files, and outputs can be  
730 found in the following GitHub repository: [https://github.com/snbogan/Sp\\_RRBS\\_ATAC](https://github.com/snbogan/Sp_RRBS_ATAC).

731

732 **Competing Interests**

733           The authors declare that they have no competing interests.

734

735 **Supplemental Material**

736 Supplemental Results – PDF of supplemental figures and tables

737 Datasheet 1 – Test statistics for differential expression and exon use

738 Datasheet 2 – Test statistics for differential methylation across CpGs and genomic features

739 Datasheet 3 – Parameters of exon use ~ exon number regressions evaluating spurious  
740 transcription and alternative TSS

741 Datasheet 4 – Enriched GO terms according to Mann Whitney U or Fisher’s exact tests

742

743

744

745

746

747 **References**

- 748 Anastasiadi, D., Esteve-Codina, A., & Piferrer, F. (2018). Consistent inverse correlation between  
749 DNA methylation of the first intron and gene expression across tissues and species.  
750 *Epigenetics & Chromatin*, *11*(1), 37. doi:10.1186/s13072-018-0205-1
- 751 Ardura, A., Zaiko, A., Moran, P., Planes, S., & Garcia-Vazquez, E. (2017). Epigenetic signatures  
752 of invasive status in populations of marine invertebrates. *Scientific Reports*, *7*, 42193.  
753 doi:10.1038/srep42193
- 754 Arsenault, S. V., Hunt, B. G., & Rehan, S. M. (2018). The effect of maternal care on gene  
755 expression and DNA methylation in a subsocial bee. *Nature Communications*, *9*(1), 3468.  
756 doi:10.1038/s41467-018-05903-0
- 757 Belkin, A. M., Retta, S. F., Pletjushkina, O. Y., Balzac, F., Silengo, L., Fassler, R., . . . Tarone,  
758 G. (1997). Muscle  $\beta$ 1D integrin reinforces the cytoskeleton–matrix link: modulation of  
759 integrin adhesive function by alternative splicing. *The Journal of Cell Biology*, *139*,  
760 1583-1595.
- 761 Biamonti, G., & Caceres, J. F. (2009). Cellular stress and RNA splicing. *Trends in Biochemical*  
762 *Sciences*, *34*(3), 146-153. doi:10.1016/j.tibs.2008.11.004
- 763 Blattler, A., Yao, L., Witt, H., Guo, Y., Nicolet, C. M., Berman, B. P., & Farnham, P. J. (2014).  
764 Global loss of DNA methylation uncovers intronic enhancers in genes showing  
765 expression changes. *Genome Biology*, *15*, 469.
- 766 Bogan, S. N., Johnson, K. M., & Hofmann, G. E. (2020). Changes in genome-wide methylation  
767 and gene expression in response to future  $p\text{CO}_2$  extremes in the Antarctic pteropod  
768 *Limacina helicina antarctica*. *Frontiers in Marine Science*, *6*.  
769 doi:10.3389/fmars.2019.00788

- 770 Bonasio, R., Li, Q., Lian, J., Mutti, N. S., Jin, L., Zhao, H., . . . Reinberg, D. (2012). Genome-  
771 wide and caste-specific DNA methylomes of the ants *Camponotus floridanus* and  
772 *Harpegnathos saltator*. *Current Biology*, 22(19), 1755-1764.  
773 doi:10.1016/j.cub.2012.07.042
- 774 Boyes, J., & Bird, A. (1992). Repression of genes by DNA methylation depends on CpG density  
775 and promoter strength: evidence for involvement of a methyl-CpG binding protein. *The*  
776 *EMBO Journal*, 11, 327-333.
- 777 Bürkner, P.-C. (2017). brms: an R package for Bayesian multilevel models using Stan. *Journal*  
778 *of Statistical Software*, 80(1). doi:10.18637/jss.v080.i01
- 779 Chen, Y., Pal, B., Visvader, J. E., & Smyth, G. K. (2017). Differential methylation analysis of  
780 reduced representation bisulfite sequencing experiments using edgeR. *F1000Research*, 6,  
781 2055. doi:10.12688/f1000research.13196.2
- 782 Clark, M. S., Suckling, C. C., Cavallo, A., Mackenzie, C. L., Thorne, M. A. S., Davies, A. J., &  
783 Peck, L. S. (2019). Molecular mechanisms underpinning transgenerational plasticity in  
784 the green sea urchin *Psammechinus miliaris*. *Scientific Reports*, 9(1), 952.  
785 doi:10.1038/s41598-018-37255-6
- 786 Clark, M. S., Thorne, M. A. S., King, M., Hipperson, H., Hoffman, J. I., Peck, L. S., & Pfrender,  
787 M. (2018). Life in the intertidal: cellular responses, methylation and epigenetics.  
788 *Functional Ecology*, 32(8), 1982-1994. doi:10.1111/1365-2435.13077
- 789 de Mendoza, A., Hatleberg, W. L., Pang, K., Leininger, S., Bogdanovic, O., Pflueger, J., . . .  
790 Lister, R. (2019). Convergent evolution of a vertebrate-like methylome in a marine  
791 sponge. *Nature Ecology & Evolution*, 3(10), 1464-1473. doi:10.1038/s41559-019-0983-2

- 792 Dimond, J. L., & Roberts, S. B. (2020). Convergence of DNA methylation profiles of the reef  
793 coral *Porites astreoides* in a novel environment. *Frontiers in Marine Science*, 6.  
794 doi:10.3389/fmars.2019.00792
- 795 Ding, J., Zhang, L., Sun, J., Shi, D., Chi, X., Yang, M., . . . Zhao, C. (2019). Transgenerational  
796 effects of UV-B radiation on egg size, fertilization, hatching and larval size of sea urchins  
797 *Strongylocentrotus intermedius*. *PeerJ*, 7, e7598. doi:10.7717/peerj.7598
- 798 Dixon, G., Liao, Y., Bay, L. K., & Matz, M. V. (2018). Role of gene body methylation in  
799 acclimatization and adaptation in a basal metazoan. *Proceedings of the National Academy*  
800 *of Sciences U.S.A.*, 115(52), 13342-13346. doi:10.1073/pnas.1813749115
- 801 Donelan, S. C., Hellmann, J. K., Bell, A. M., Luttbeg, B., Orrock, J. L., Sheriff, M. J., & Sih, A.  
802 (2020). Transgenerational plasticity in human-altered environments. *Trends in Ecology &*  
803 *Evolution*, 35(2), 115-124. doi:10.1016/j.tree.2019.09.003
- 804 Downey-Wall, A. M., Cameron, L. P., Ford, B. M., McNally, E. M., Venkataraman, Y. R.,  
805 Roberts, S. B., . . . Lotterhos, K. E. (2020). Ocean acidification induces subtle shifts in  
806 gene expression and DNA methylation in mantle tissue of the Eastern oyster (*Crassostrea*  
807 *virginica*). *Frontiers in Marine Science*, 7, 566419. doi:10.3389/fmars.2020.566419
- 808 Eirin-Lopez, J. M., & Putnam, H. M. (2019). Marine environmental epigenetics. *Annual Review*  
809 *of Marine Science*, 11, 335-368. doi:10.1146/annurev-marine-010318-095114
- 810 Evans, T. G., Chan, F., Menge, B. A., & Hofmann, G. E. (2013). Transcriptomic responses to  
811 ocean acidification in larval sea urchins from a naturally variable pH environment.  
812 *Molecular Ecology*, 22(6), 1609-1625. doi:10.1111/mec.12188
- 813 Evans, T. G., Pespeni, M. H., Hofmann, G. E., Palumbi, S. R., & Sanford, E. (2017).  
814 Transcriptomic responses to seawater acidification among sea urchin populations



- 815 inhabiting a natural pH mosaic. *Molecular Ecology*, 26(8), 2257-2275.
- 816 doi:10.1111/mec.14038
- 817 Exposito, J. Y., D'Alessio, M., & Ramirez, F. (1992). Novel amino-terminal propeptide  
818 configuration in a fibrillar procollagen undergoing alternative splicing. *Journal of*  
819 *Biological Chemistry*, 267(24), 17404-17408. doi:10.1016/s0021-9258(18)41940-0
- 820 Fangué, N. A., O'Donnell, M. J., Sewell, M. A., Matson, P. G., MacPherson, A. C., & Hofmann,  
821 G. E. (2010). A laboratory-based, experimental system for the study of ocean  
822 acidification effects on marine invertebrate larvae. *Limnology and Oceanography:*  
823 *Methods*, 8(8), 441-452. doi:10.4319/lom.2010.8.441
- 824 Flores, K., Wolschin, F., Corneveaux, J. J., Allen, A. N., Huentelman, M. J., & Amdam, G. V.  
825 (2012). Genome-wide association between DNA methylation and alternative splicing in  
826 an invertebrate. *BMC Genomics*, 13, 480. doi:10.1186/1471-2164-13-480
- 827 Gao, F., Liu, X., Wu, X.-P., Wang, X.-L., Gong, D., Lu, H., . . . Liu, M. (2012). Differential  
828 DNA methylation in discrete developmental stages of the parasitic nematode *Trichinella*  
829 *piralis*. *Genome Biology*, 13, R100. doi:10.5524/100043
- 830 Gatzmann, F., Falckenhayn, C., Gutekunst, J., Hanna, K., Raddatz, G., Carneiro, V. C., & Lyko,  
831 F. (2018). The methylome of the marbled crayfish links gene body methylation to stable  
832 expression of poorly accessible genes. *Epigenetics & Chromatin*, 11(1), 57.  
833 doi:10.1186/s13072-018-0229-6
- 834 Glastad, K. M., Gokhale, K., Liebig, J., & Goodisman, M. A. (2016). The caste- and sex-specific  
835 DNA methylome of the termite *Zootermopsis nevadensis*. *Scientific Reports*, 6, 37110.  
836 doi:10.1038/srep37110

- 837 Gomez-Marin, C., Tena, J. J., Acemel, R. D., Lopez-Mayorga, M., Naranjo, S., de la Calle-  
838 Mustienes, E., . . . Gomez-Skarmeta, J. L. (2015). Evolutionary comparison reveals that  
839 diverging CTCF sites are signatures of ancestral topological associating domains borders.  
840 *Proceedings of the National Academy of Sciences U.S.A*, 112(24), 7542-7547.  
841 doi:10.1073/pnas.1505463112
- 842 Goodrich, B., Gabry, J., Ali, I., & Brilleman, S. (2020). rstanarm: Bayesian applied regression  
843 modeling via Stan (Version R package version 2.21.1). Retrieved from [https://mc-](https://mc-stan.org/rstanarm)  
844 [stan.org/rstanarm](https://mc-stan.org/rstanarm)
- 845 Grishkevich, V., & Yanai, I. (2014). Gene length and expression level shape genomic novelties.  
846 *Genome Research*, 24(9), 1497-1503. doi:10.1101/gr.169722.113
- 847 Gronau, Q. F., & Wagenmakers, E. J. (2019). Limitations of Bayesian leave-one-out cross-  
848 validation for model selection. *Computational Brain & Behavior*, 2(1), 1-11.  
849 doi:10.1007/s42113-018-0011-7
- 850 Haddrill, P. R., Charlesworth, B., Halligan, D. L., & Andolfatto, P. (2005). Patterns of intron  
851 sequence evolution in *Drosophila* are dependent upon length and GC content. *Genome*  
852 *Biology*, 6(8), R67. doi:10.1186/gb-2005-6-8-r67
- 853 Hawes, N. A., Tremblay, L. A., Pochon, X., Dunphy, B., Fidler, A. E., & Smith, K. F. (2018).  
854 Effects of temperature and salinity stress on DNA methylation in a highly invasive  
855 marine invertebrate, the colonial ascidian *Didemnum vexillum*. *PeerJ*, 6, e5003.  
856 doi:10.7717/peerj.5003
- 857 Herman, J. J., & Sultan, S. E. (2011). Adaptive transgenerational plasticity in plants: case  
858 studies, mechanisms, and implications for natural populations. *Frontiers in Plant Science*,  
859 2, 102. doi:10.3389/fpls.2011.00102

- 860 Hinne, M., Gronau, Q. F., van den Bergh, D., & Wagenmakers, E. J. (2020). A conceptual  
861 introduction to Bayesian model averaging. *Advances in Methods and Practices in*  
862 *Psychological Sciences*, 3(2), 200-215.
- 863 Hofmann, G. E. (2017). Ecological epigenetics in marine metazoans. *Frontiers in Marine*  
864 *Science*, 4. doi:10.3389/fmars.2017.00004
- 865 Hoshijima, U., & Hofmann, G. E. (2019). Variability of Seawater Chemistry in a Kelp Forest  
866 Environment Is Linked to in situ Transgenerational Effects in the Purple Sea Urchin,  
867 *Strongylocentrotus purpuratus*. *Frontiers in Marine Science*, 6.  
868 doi:10.3389/fmars.2019.00062
- 869 Hunt, B. G., Brisson, J. A., Yi, S. V., & Goodisman, M. A. (2010). Functional conservation of  
870 DNA methylation in the pea aphid and the honeybee. *Genome Biology and Evolution*, 2,  
871 719-728. doi:10.1093/gbe/evq057
- 872 Jain, S., Ba, Z., Zhang, Y., Dai, H. Q., & Alt, F. W. (2018). CTCF-binding elements mediate  
873 accessibility of RAG substrates during chromatin scanning. *Cell*, 174(1), 102-116 e114.  
874 doi:10.1016/j.cell.2018.04.035
- 875 Johnson, K. M., & Kelly, M. W. (2020). Population epigenetic divergence exceeds genetic  
876 divergence in the Eastern oyster *Crassostrea virginica* in the Northern Gulf of Mexico.  
877 *Evolutionary Applications*, 13(5), 945-959. doi:10.1111/eva.12912
- 878 Johnson, K. M., Sirovy, K. A., Casas, S. M., La Peyre, J. F., & Kelly, M. W. (2020).  
879 Characterizing the epigenetic and transcriptomic responses to *Perkinsus marinus*  
880 infection in the eastern oyster *Crassostrea virginica*. *Frontiers in Marine Science*, 6, 598.  
881 doi:10.3389/fmars.2020.00598

- 882 Jones, B. M., & Robinson, G. E. (2018). Genetic accommodation and the role of ancestral  
883 plasticity in the evolution of insect eusociality. *Journal of Experimental Biology*, 221(Pt  
884 23). doi:10.1242/jeb.153163
- 885 Kalsotra, A., & Cooper, T. A. (2011). Functional consequences of developmentally regulated  
886 alternative splicing. *Nature Reviews Genetics*, 12(10), 715-729. doi:10.1038/nrg3052
- 887 Karelitz, S., Lamare, M., Patel, F., Gemmell, N., & Uthicke, S. (2019). Parental acclimation to  
888 future ocean conditions increases development rates but decreases survival in sea urchin  
889 larvae. *Marine Biology*, 167(1). doi:10.1007/s00227-019-3610-5
- 890 Keller, T. E., Han, P., & Yi, S. V. (2016). Evolutionary transition of promoter and gene body  
891 DNA methylation across invertebrate-vertebrate boundary. *Molecular Biology and  
892 Evolution*, 33(4), 1019-1028. doi:10.1093/molbev/msv345
- 893 Kelly, M. W., Padilla-Gamino, J. L., & Hofmann, G. E. (2013). Natural variation and the  
894 capacity to adapt to ocean acidification in the keystone sea urchin *Strongylocentrotus  
895 purpuratus*. *Global Change Biology*, 19(8), 2536-2546. doi:10.1111/gcb.12251
- 896 Keren, H., Lev-Maor, G., & Ast, G. (2010). Alternative splicing and evolution: Diversification,  
897 exon definition and function. *Nature Reviews Genetics*, 11(5), 345-355.  
898 doi:10.1038/nrg2776
- 899 Khor, J. M., Guerrero-Santoro, J., Douglas, W., & Etensohn, C. A. (2021). Global patterns of  
900 enhancer activity during sea urchin embryogenesis assessed by eRNA profiling. *Genome  
901 Research*. doi:10.1101/gr.275684.121
- 902 Kim, D., Langmead, B., & Salzberg, S. L. (2015). HISAT: a fast spliced aligner with low  
903 memory requirements. *Nature Methods*, 12(4), 357-360. doi:10.1038/nmeth.3317

- 904 Klemm, S. L., Shipony, Z., & Greenleaf, W. J. (2019). Chromatin accessibility and the  
905 regulatory epigenome. *Nature Reviews Genetics*, *20*(4), 207-220. doi:10.1038/s41576-  
906 018-0089-8
- 907 Klose, R. J., & Bird, A. P. (2006). Genomic DNA methylation: the mark and its mediators.  
908 *Trends in Biochemical Sciences*, *31*(2), 89-97. doi:10.1016/j.tibs.2005.12.008
- 909 Krueger, F., & Andrews, S. R. (2011). Bismark: a flexible aligner and methylation caller for  
910 Bisulfite-Seq applications. *Bioinformatics*, *27*(11), 1571-1572.  
911 doi:10.1093/bioinformatics/btr167
- 912 Kudtarkar, P., & Cameron, R. A. (2017). Echinobase: an expanding resource for echinoderm  
913 genomic information. *Database (Oxford)*, *2017*. doi:10.1093/database/bax074
- 914 Kvist, J., Goncalves Athanasio, C., Shams Solari, O., Brown, J. B., Colbourne, J. K., Pfrender,  
915 M. E., & Mirbahai, L. (2018). Pattern of DNA methylation in *Daphnia*: evolutionary  
916 perspective. *Genome Biology and Evolution*, *10*(8), 1988-2007. doi:10.1093/gbe/evy155
- 917 Leung, C. L., Zheng, M., Prater, S. M., & Liem, R. K. (2001). The BPAG1 locus: Alternative  
918 splicing produces multiple isoforms with distinct cytoskeletal linker domains, including  
919 predominant isoforms in neurons and muscles. *The Journal of Cell Biology*, *154*(4), 691-  
920 697. doi:10.1083/jcb.200012098
- 921 Lev Maor, G., Yearim, A., & Ast, G. (2015). The alternative role of DNA methylation in  
922 splicing regulation. *Trends in Genetics*, *31*(5), 274-280. doi:10.1016/j.tig.2015.03.002
- 923 Lewis, S. H., Ross, L., Bain, S. A., Pahita, E., Smith, S. A., Cordaux, R., . . . Sarkies, P. (2020).  
924 Widespread conservation and lineage-specific diversification of genome-wide DNA  
925 methylation patterns across arthropods. *PLoS Genetics*, *16*(6), e1008864.  
926 doi:10.1371/journal.pgen.1008864

- 927 Lhoumaud, P., Sethia, G., Izzo, F., Sakellaropoulos, T., Snetkova, V., Vidal, S., . . . Skok, J.  
928 (2019). EpiMethylTag: simultaneous detection of ATAC-seq or CHIP-seq signals with  
929 DNA methylation. *Genome Biology*, 20(1), 248. doi:10.1186/s13059-019-1853-6
- 930 Li, Y., Liew, Y. J., Cui, G., Cziesielski, M. J., Zahran, N., Michell, C. T., . . . Aranda, M. (2018).  
931 DNA methylation regulates transcriptional homeostasis of algal endosymbiosis in the  
932 coral model *Aiptasia*. *Science Advances*, 4, eaat2142. doi:10.1126/sciadv.aat2142
- 933 Li-Byarlay, H., Li, Y., Stroud, H., Feng, S., Newman, T. C., Kaneda, M., . . . Robinson, G. E.  
934 (2013). RNA interference knockdown of DNA methyl-transferase 3 affects gene  
935 alternative splicing in the honey bee. *Proceedings of the National Academy of Sciences*  
936 *U.S.A.*, 110(31), 12750-12755. doi:10.1073/pnas.1310735110
- 937 Libbrecht, R., Oxley, P. R., Keller, L., & Kronauer, D. J. (2016). Robust DNA methylation in the  
938 clonal raider ant brain. *Current Biology*, 26(3), 391-395. doi:10.1016/j.cub.2015.12.040
- 939 Liew, Y. J., Howells, E. J., Wang, X., Michell, C. T., Burt, J. A., Idaghdour, Y., & Aranda, M.  
940 (2020). Intergenerational epigenetic inheritance in reef-building corals. *Nature Climate*  
941 *Change*, 10(3), 254-259. doi:10.1038/s41558-019-0687-2
- 942 Lindeman, L. C., Thaulow, J., Song, Y., Kamstra, J. H., Xie, L., Asselman, J., . . . Tollefsen, K.  
943 E. (2019). Epigenetic, transcriptional and phenotypic responses in two generations of  
944 *Daphnia magna* exposed to the DNA methylation inhibitor 5-azacytidine. *Environmental*  
945 *Epigenetics*, 5(3), dvz016. doi:10.1093/eep/dvz016
- 946 Makowski, D., Ben-Shachar, M., & Lüdecke, D. (2019). bayestestR: describing effects and their  
947 uncertainty, existence and significance within the Bayesian framework. *Journal of Open*  
948 *Source Software*, 4(40). doi:10.21105/joss.01541

- 949 Makowski, D., Ben-Shachar, M. S., Chen, S. H. A., & Ludecke, D. (2019). Indices of effect  
950 existence and significance in the Bayesian framework. *Frontiers in Psychology, 10*, 2767.  
951 doi:10.3389/fpsyg.2019.02767
- 952 Marshall, D. J., & Uller, T. (2007). When is a maternal effect adaptive? *Oikos, 116*(12), 1957-  
953 1963. doi:10.1111/j.2007.0030-1299.16203.x
- 954 Maunakea, A. K., Chepelev, I., Cui, K., & Zhao, K. (2013). Intragenic DNA methylation  
955 modulates alternative splicing by recruiting MeCP2 to promote exon recognition. *Cell*  
956 *Research, 23*(11), 1256-1269. doi:10.1038/cr.2013.110
- 957 McCarthy, D. J., Chen, Y., & Smyth, G. K. (2012). Differential expression analysis of  
958 multifactor RNA-Seq experiments with respect to biological variation. *Nucleic Acids*  
959 *Research, 40*(10), 4288-4297. doi:10.1093/nar/gks042
- 960 McCoy, M. J., & Fire, A. Z. (2020). Intron and gene size expansion during nervous system  
961 evolution. *BMC Genomics, 21*(1), 360. doi:10.1186/s12864-020-6760-4
- 962 Moler, E. R. V., Abakir, A., Eleftheriou, M., Johnson, J. S., Krutovsky, K. V., Lewis, L. C., . . .  
963 Rajora, O. P. (2018). Population epigenomics: advancing understanding of phenotypic  
964 plasticity, acclimation, adaptation and diseases. In O. P. Rajora (Ed.), *Population*  
965 *Genomics*: Springer.
- 966 Naftelberg, S., Schor, I. E., Ast, G., & Kornblihtt, A. R. (2015). Regulation of alternative  
967 splicing through coupling with transcription and chromatin structure. *Annual Reviews of*  
968 *Biochemistry, 84*, 165-198. doi:10.1146/annurev-biochem-060614-034242
- 969 Nanty, L., Carbajosa, G., Heap, G. A., Ratnieks, F., van Heel, D. A., Down, T. A., & Rakyán, V.  
970 K. (2011). Comparative methylomics reveals gene-body H3K36me3 in *Drosophila*

- 971 predicts DNA methylation and CpG landscapes in other invertebrates. *Genome Research*,  
972 21(11), 1841-1850. doi:10.1101/gr.121640.111
- 973 Neri, F., Rapelli, S., Krepelova, A., Incarnato, D., Parlato, C., Basile, G., . . . Oliviero, S. (2017).  
974 Intragenic DNA methylation prevents spurious transcription initiation. *Nature*,  
975 543(7643), 72-77. doi:10.1038/nature21373
- 976 Ni, P., Li, S., Lin, Y., Xiong, W., Huang, X., & Zhan, A. (2018). Methylation divergence of  
977 invasive *Ciona ascidians*: significant population structure and local environmental  
978 influence. *Ecology and Evolution*, 8(20), 10272-10287. doi:10.1002/ece3.4504
- 979 Norouzitallab, P., Baruah, K., Vandegehuchte, M., Van Stappen, G., Catania, F., Vanden  
980 Bussche, J., . . . Bossier, P. (2014). Environmental heat stress induces epigenetic  
981 transgenerational inheritance of robustness in parthenogenetic *Artemia* model. *The*  
982 *FASEB Journal*, 28(8), 3552-3563. doi:10.1096/fj.14-252049
- 983 O'Leary, H., Lasda, E., & Bayer, K. U. (2006). CaMKII $\beta$  association with the actin cytoskeleton  
984 is regulated by alternative splicing. *Molecular Biology of the Cell*, 17, 4656-4665.  
985 doi:10.1091/mbc.E06
- 986 Park, J., Peng, Z., Zeng, J., Elango, N., Park, T., Wheeler, D., . . . Yi, S. V. (2011). Comparative  
987 analyses of DNA methylation and sequence evolution using *Nasonia* genomes.  
988 *Molecular Biology and Evolution*, 28(12), 3345-3354. doi:10.1093/molbev/msr168
- 989 Pespeni, M. H., Chan, F., Menge, B. A., & Palumbi, S. R. (2013). Signs of adaptation to local pH  
990 conditions across an environmental mosaic in the California Current Ecosystem.  
991 *Integrative and Comparative Biology*, 53(5), 857-870. doi:10.1093/icb/ict094



- 992 Pespeni, M. H., & Palumbi, S. R. (2013). Signals of selection in outlier loci in a widely  
993 dispersing species across an environmental mosaic. *Molecular Ecology*, 22(13), 3580-  
994 3597. doi:10.1111/mec.12337
- 995 Putnam, H. M., Davidson, J. M., & Gates, R. D. (2016). Ocean acidification influences host  
996 DNA methylation and phenotypic plasticity in environmentally susceptible corals.  
997 *Evolutionary Applications*, 9(9), 1165-1178. doi:10.1111/eva.12408
- 998 Regev, A., Lamb, M. J., & Jablonka, E. (1998). The role of DNA methylation in invertebrates:  
999 developmental regulation or genome defense? *Molecular Biology and Evolution*, 15(7),  
1000 880-891. doi:10.1093/oxfordjournals.molbev.a025992
- 1001 Rigal, M., Kevei, Z., Pelissier, T., & Mathieu, O. (2012). DNA methylation in an intron of the  
1002 IBM1 histone demethylase gene stabilizes chromatin modification patterns. *The EMBO*  
1003 *Journal*, 31(13), 2981-2993. doi:10.1038/emboj.2012.141
- 1004 Riviere, G., He, Y., Tecchio, S., Crowell, E., Gras, M., Sourdain, P., . . . Favrel, P. (2017).  
1005 Dynamics of DNA methylomes underlie oyster development. *PLoS Genetics*, 13(6),  
1006 e1006807. doi:10.1371/journal.pgen.1006807
- 1007 Robinson, M. D., McCarthy, D. J., & Smyth, G. K. (2010). edgeR: a Bioconductor package for  
1008 differential expression analysis of digital gene expression data. *Bioinformatics*, 26(1),  
1009 139-140. doi:10.1093/bioinformatics/btp616
- 1010 Rodríguez-Casariego, J. A., Mercado-Molina, A. E., Garcia-Souto, D., Ortiz-Rivera, I. M.,  
1011 Lopes, C., Baums, I. B., . . . Eirin-Lopez, J. M. (2020). Genome-wide DNA methylation  
1012 analysis reveals a conserved epigenetic response to seasonal environmental variation in  
1013 the staghorn coral *Acropora cervicornis*. *Frontiers in Marine Science*, 7.  
1014 doi:10.3389/fmars.2020.560424

- 1015 Rose, A. B. (2008). Intron-mediated regulation of gene expression. In A. S. N. Reddy & M.  
1016 Golovkin (Eds.), *Nuclear pre-mRNA Processing in Plants. Current Topics in*  
1017 *Microbiology and Immunology*. Berlin Heidelberg: Springer.
- 1018 Rose, A. B. (2018). Introns as gene regulators: a brick on the accelerator. *Frontiers in Genetics*,  
1019 9, 672. doi:10.3389/fgene.2018.00672
- 1020 Sarda, S., Zeng, J., Hunt, B. G., & Yi, S. V. (2012). The evolution of invertebrate gene body  
1021 methylation. *Molecular Biology and Evolution*, 29(8), 1907-1916.  
1022 doi:10.1093/molbev/mss062
- 1023 Shayevitch, R., Askayo, D., Keydar, I., & Ast, G. (2018). The importance of DNA methylation  
1024 of exons on alternative splicing. *RNA*, 24, 1351-1362. doi:10.1261/rna
- 1025 Shi, Y., Su, X. B., He, K. Y., Wu, B. H., Zhang, B. Y., & Han, Z. G. (2016). Chromatin  
1026 accessibility contributes to simultaneous mutations of cancer genes. *Scientific Reports*, 6,  
1027 35270. doi:10.1038/srep35270
- 1028 Song, K., Li, L., & Zhang, G. (2017). The association between DNA methylation and exon  
1029 expression in the Pacific oyster *Crassostrea gigas*. *PLoS One*, 12(9), e0185224.  
1030 doi:10.1371/journal.pone.0185224
- 1031 Strader, M. E., Kozal, L. C., Leach, T. S., Wong, J. M., Chamorro, J. D., Housh, M. J., &  
1032 Hofmann, G. E. (2020). Examining the role of DNA methylation in transcriptomic  
1033 plasticity of early stage sea urchins: developmental and maternal effects in a kelp forest  
1034 herbivore. *Frontiers in Marine Science*, 7. doi:10.3389/fmars.2020.00205
- 1035 Strader, M. E., Wong, J. M., Kozal, L. C., Leach, T. S., & Hofmann, G. E. (2019). Parental  
1036 environments alter DNA methylation in offspring of the purple sea urchin,

- 1037 *Strongylocentrotus purpuratus*. *Journal of Experimental Marine Biology and Ecology*,  
1038 517, 54-64. doi:10.1016/j.jembe.2019.03.002
- 1039 Sultan, M., Amstislavskiy, V., Risch, T., Schuette, M., Dökel, S., Ralser, M., . . . Yaspo, M.  
1040 (2014). Influence of RNA extraction methods and library selection schemes on RNA-seq  
1041 data. *BMC Genomics*, 15, 675.
- 1042 Suzuki, M. M., Kerr, A. R., De Sousa, D., & Bird, A. (2007). CpG methylation is targeted to  
1043 transcription units in an invertebrate genome. *Genome Research*, 17(5), 625-631.  
1044 doi:10.1101/gr.6163007
- 1045 Tan, M. (2010). Analysis of DNA methylation of maize in response to osmotic and salt stress  
1046 based on methylation-sensitive amplified polymorphism. *Plant Physiology and*  
1047 *Biochemistry*, 48, 21-26. doi:10.1016/j.plaphy.20
- 1048 Trigg, S. A., Venkataraman, Y. R., Gavery, M. R., Roberts, S. B., Bhattacharya, D., Downey-  
1049 Wall, A., . . . Putnam, H. M. (2021). Invertebrate methylomes provide insight into  
1050 mechanisms of environmental tolerance and reveal methodological biases. *bioRxiv*.  
1051 doi:10.1101/2021.03.29.437539
- 1052 Tu, Q., Cameron, R. A., Worley, K. C., Gibbs, R. A., & Davidson, E. H. (2012). Gene structure  
1053 in the sea urchin *Strongylocentrotus purpuratus* based on transcriptome analysis. *Genome*  
1054 *Research*, 22(10), 2079-2087. doi:10.1101/gr.139170.112
- 1055 Vandegehuchte, M. B., Lemiere, F., Vanhaecke, L., Vanden Berghe, W., & Janssen, C. R.  
1056 (2010). Direct and transgenerational impact on *Daphnia magna* of chemicals with a  
1057 known effect on DNA methylation. *Comparative Biochemistry and Physiology C:*  
1058 *Toxicology & Pharmacology*, 151(3), 278-285. doi:10.1016/j.cbpc.2009.11.007

- 1059 Wang, X., Li, A., Wang, W., Que, H., Zhang, G., & Li, L. (2021). DNA methylation mediates  
1060 differentiation in thermal responses of Pacific oyster (*Crassostrea gigas*) derived from  
1061 different tidal levels. *Heredity (Edinb.)*, *126*(1), 10-22. doi:10.1038/s41437-020-0351-7
- 1062 Wang, X., Song, W., Ji, G., Song, Y., Liu, X., Luo, X., . . . Sun, S. (2021). Regulation of DNA  
1063 methylation on key parasitism genes of *Cysticercus cellulosae* revealed by integrative  
1064 epigenomic-transcriptomic analyses. *Hereditas*, *158*(1), 28. doi:10.1186/s41065-021-  
1065 00195-9
- 1066 Wang, X., Werren, J. H., & Clark, A. G. (2016). Allele-specific transcriptome and methylome  
1067 analysis reveals stable inheritance and *cis*-regulation of DNA methylation in *Nasonia*.  
1068 *PLoS Biology*, *14*(7), e1002500. doi:10.1371/journal.pbio.1002500
- 1069 Watson, R. G. A., Baldanzi, S., Pérez-Figueroa, A., Gouws, G., & Porri, F. (2018).  
1070 Morphological and epigenetic variation in mussels from contrasting environments.  
1071 *Marine Biology*, *165*(3). doi:10.1007/s00227-018-3310-6
- 1072 Wong, J. J., Gao, D., Nguyen, T. V., Kwok, C. T., van Geldermalsen, M., Middleton, R., . . .  
1073 Rasko, J. E. J. (2017). Intron retention is regulated by altered MeCP2-mediated splicing  
1074 factor recruitment. *Nature Communications*, *8*, 15134. doi:10.1038/ncomms15134
- 1075 Wong, J. M., & Hofmann, G. E. (2020). The effects of temperature and *p*CO<sub>2</sub> on the size,  
1076 thermal tolerance and metabolic rate of the red sea urchin (*Mesocentrotus franciscanus*)  
1077 during early development. *Marine Biology*, *167*(3). doi:10.1007/s00227-019-3633-y
- 1078 Wong, J. M., & Hofmann, G. E. (2021). Gene expression patterns of red sea urchins  
1079 (*Mesocentrotus franciscanus*) exposed to different combinations of temperature and  
1080 *p*CO<sub>2</sub> during early development. *BMC Genomics*, *22*(1), 32. doi:10.1186/s12864-020-  
1081 07327-x

- 1082 Wong, J. M., Johnson, K. M., Kelly, M. W., & Hofmann, G. E. (2018). Transcriptomics reveal  
1083 transgenerational effects in purple sea urchin embryos: adult acclimation to upwelling  
1084 conditions alters the response of their progeny to differential  $p\text{CO}_2$  levels. *Molecular*  
1085 *Ecology*, 27(5), 1120-1137. doi:10.1111/mec.14503
- 1086 Wong, J. M., Kozal, L. C., Leach, T. S., Hoshijima, U., & Hofmann, G. E. (2019).  
1087 Transgenerational effects in an ecological context: conditioning of adult sea urchins to  
1088 upwelling conditions alters maternal provisioning and progeny phenotype. *Journal of*  
1089 *Experimental Marine Biology and Ecology*, 517, 65-77. doi:10.1016/j.jembe.2019.04.006
- 1090 Wright, R. M., Aglyamova, G. V., Meyer, E., & Matz, M. V. (2015). Gene expression associated  
1091 with white syndromes in a reef building coral, *Acropora hyacinthus*. *BMC Genomics*, 16,  
1092 371. doi:10.1186/s12864-015-1540-2
- 1093 Xu, G., Lyu, H., Yi, Y., Peng, Y., Feng, Q., Song, Q., . . . Zheng, S. (2021). Intragenic DNA  
1094 methylation regulates insect gene expression and reproduction through the MBD/Tip60  
1095 complex. *iScience*, 24(2), 102040. doi:10.1016/j.isci.2021.102040
- 1096 Xu, J., Chen, G., Hermanson, P. J., Xu, Q., Sun, C., Chen, W., . . . Li, Q. (2019). Population-  
1097 level analysis reveals the widespread occurrence and phenotypic consequence of DNA  
1098 methylation variation not tagged by genetic variation in maize. *Genome Biology*, 20(1),  
1099 243. doi:10.1186/s13059-019-1859-0
- 1100 Yang, X., Han, H., De Carvalho, D. D., Lay, F. D., Jones, P. A., & Liang, G. (2014). Gene body  
1101 methylation can alter gene expression and is a therapeutic target in cancer. *Cancer Cell*,  
1102 26(4), 577-590. doi:10.1016/j.ccr.2014.07.028

- 1103 Yang, Y., Zheng, Y., Sun, L., & Chen, M. (2020). Genome-wide DNA methylation signatures of  
1104 sea cucumber *Apostichopus japonicus* during environmental induced aestivation. *Genes*  
1105 (*Basel*), *11*(9). doi:10.3390/genes11091020
- 1106 Yin, X., Romero-Campero, F. J., de Los Reyes, P., Yan, P., Yang, J., Tian, G., . . . Zhou, Y.  
1107 (2021). H2AK121ub in *Arabidopsis* associates with a less accessible chromatin state at  
1108 transcriptional regulation hotspots. *Nature Communications*, *12*(1), 315.  
1109 doi:10.1038/s41467-020-20614-1
- 1110 Zemach, A., McDaniel, I. E., Silva, P., & Zilberman, D. (2010). Genome-wide evolutionary  
1111 analysis of eukaryotic DNA methylation. *Science*, *328*(5980), 916-919.  
1112 doi:10.1126/science.1186366
- 1113 Zhang, X., Li, Q., Kong, L., & Yu, H. (2018). Epigenetic variation of wild populations of the  
1114 Pacific oyster *Crassostrea gigas* determined by methylation-sensitive amplified  
1115 polymorphism analysis. *Fisheries Science*, *84*(1), 61-70. doi:10.1007/s12562-017-1154-5
- 1116 Zhong, Z., Feng, S., Duttke, S. H., Potok, M. E., Zhang, Y., Gallego-Bartolome, J., . . . Jacobsen,  
1117 S. E. (2021). DNA methylation-linked chromatin accessibility affects genomic  
1118 architecture in *Arabidopsis*. *Proceedings of the National Academy of Sciences U.S.A.*,  
1119 *118*(5). doi:10.1073/pnas.2023347118
- 1120 Zilberman, D. (2017). An evolutionary case for functional gene body methylation in plants and  
1121 animals. *Genome Biology*, *18*(1), 87. doi:10.1186/s13059-017-1230-2  
1122
